# Supplementary material for: Identification of a Profile of Neutrophil-Derived Granule Proteins in the Surface of Gold Nanoparticles after Their Interaction with Human Breast Cancer Sera
Source: PubMed Central journal article supplement (PMC7353125; doi:10.3390/nano10061223), 2020-06-23
Supplement: nanomaterials-10-01223-s001.pdf [file nanomaterials-10-01223-s001.pdf]

**Figure S1.** TEM image of AuNPs@citrate in aqueous phase and the characterization data.

| <b>AuNPs@citrate (nm)</b> |       |    |       |
|---------------------------|-------|----|-------|
| 1                         | 7.94  | 21 | 10.35 |
| 2                         | 8.37  | 22 | 10.38 |
| 3                         | 8.38  | 23 | 10.41 |
| 4                         | 8.60  | 24 | 10.44 |
| 5                         | 8.78  | 25 | 10.56 |
| 6                         | 8.78  | 26 | 10.65 |
| 7                         | 8.87  | 27 | 10.65 |
| 8                         | 9.17  | 28 | 10.68 |
| 9                         | 9.19  | 29 | 10.80 |
| 10                        | 9.41  | 30 | 10.81 |
| 11                        | 9.49  | 31 | 10.83 |
| 12                        | 9.49  | 32 | 10.85 |
| 13                        | 9.55  | 33 | 10.86 |
| 14                        | 9.62  | 34 | 10.86 |
| 15                        | 9.82  | 35 | 10.88 |
| 16                        | 9.84  | 36 | 10.95 |
| 17                        | 9.89  | 37 | 10.96 |
| 18                        | 9.89  | 38 | 10.99 |
| 19                        | 9.99  | 39 | 11.48 |
| 20                        | 10.03 | 40 | 11.50 |
| Count                     | 40    |    |       |
| Mean                      | 10.02 |    |       |
| Minimum                   | 7.94  |    |       |
| Maximum                   | 11.50 |    |       |
| Standard Deviation        | 0.91  |    |       |

### AuNPs@citrate

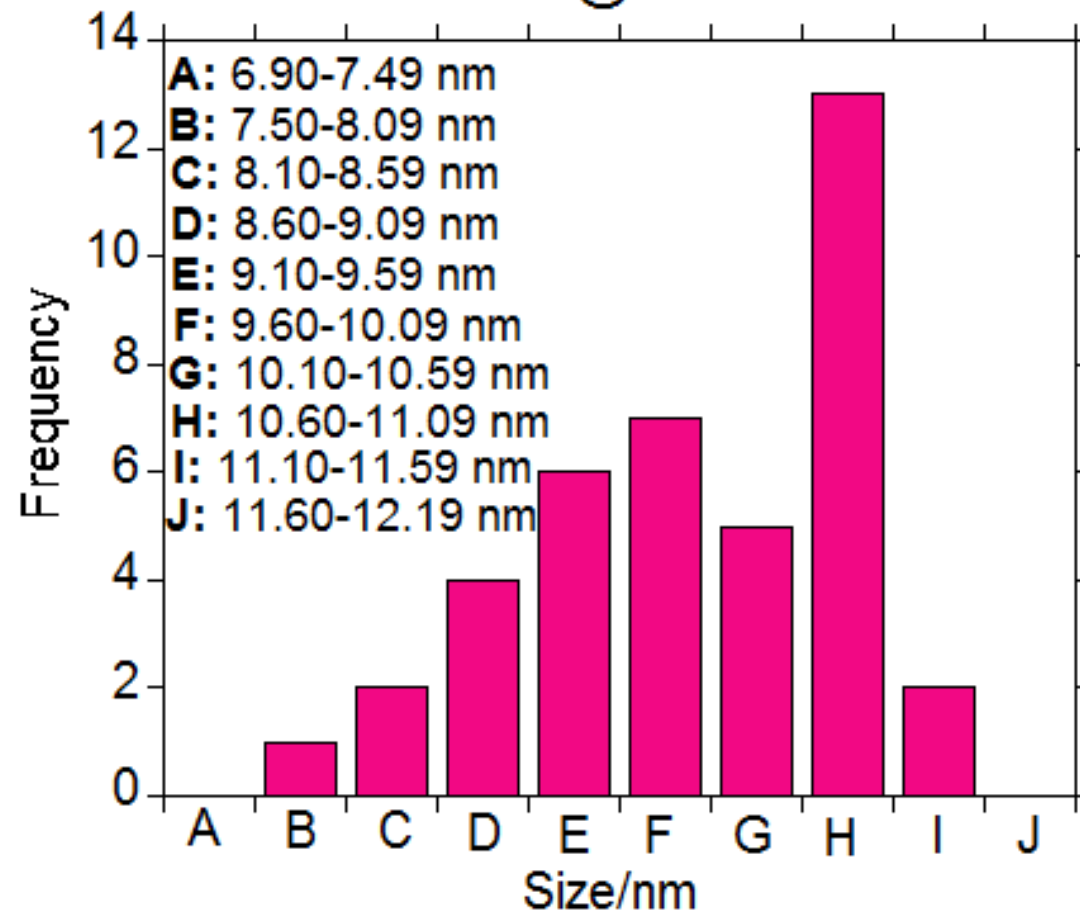

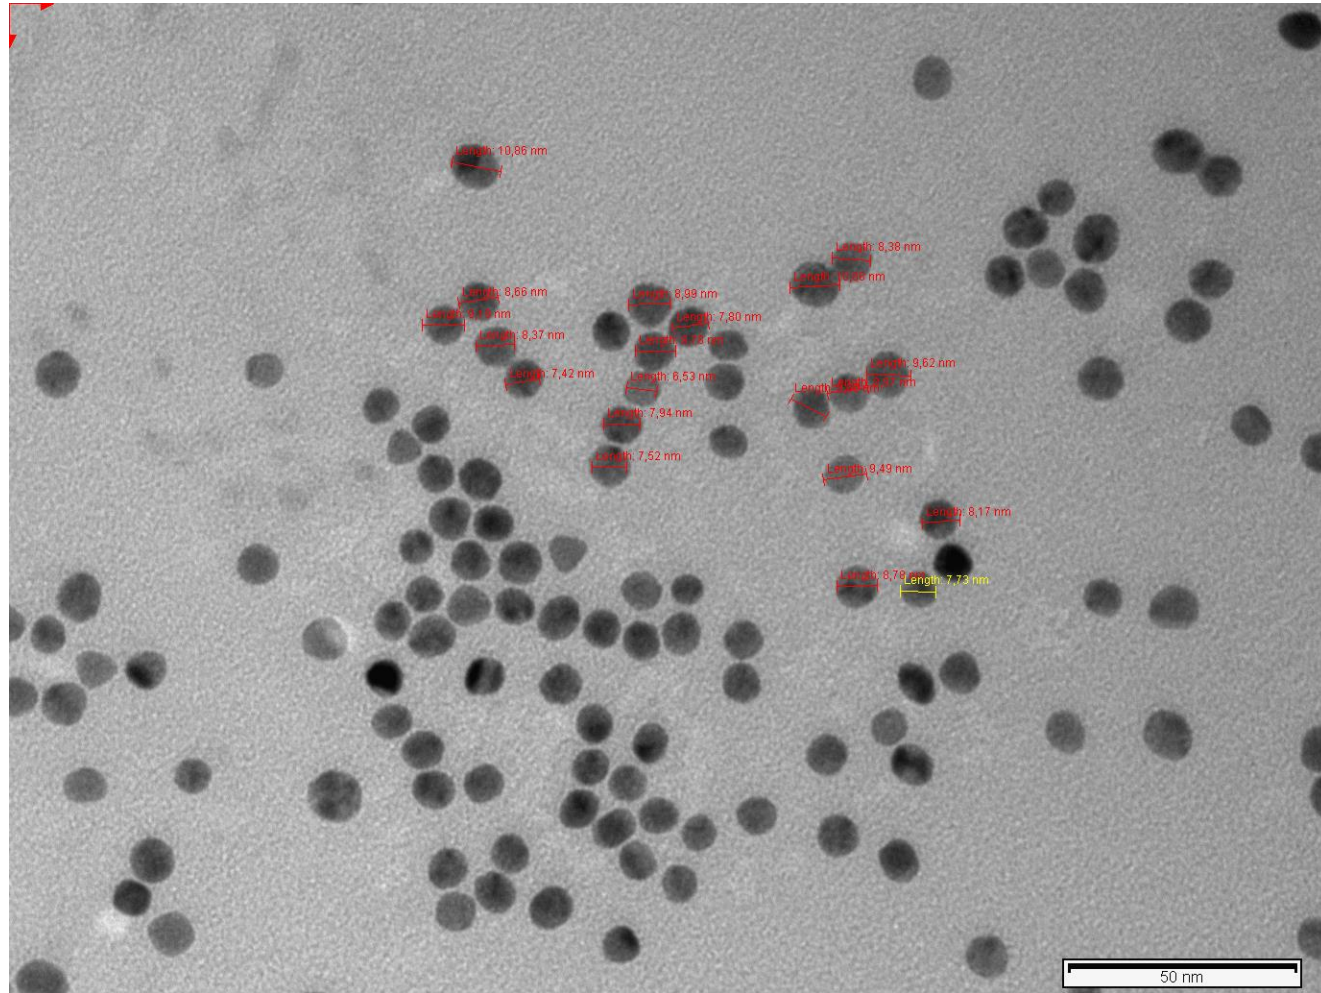

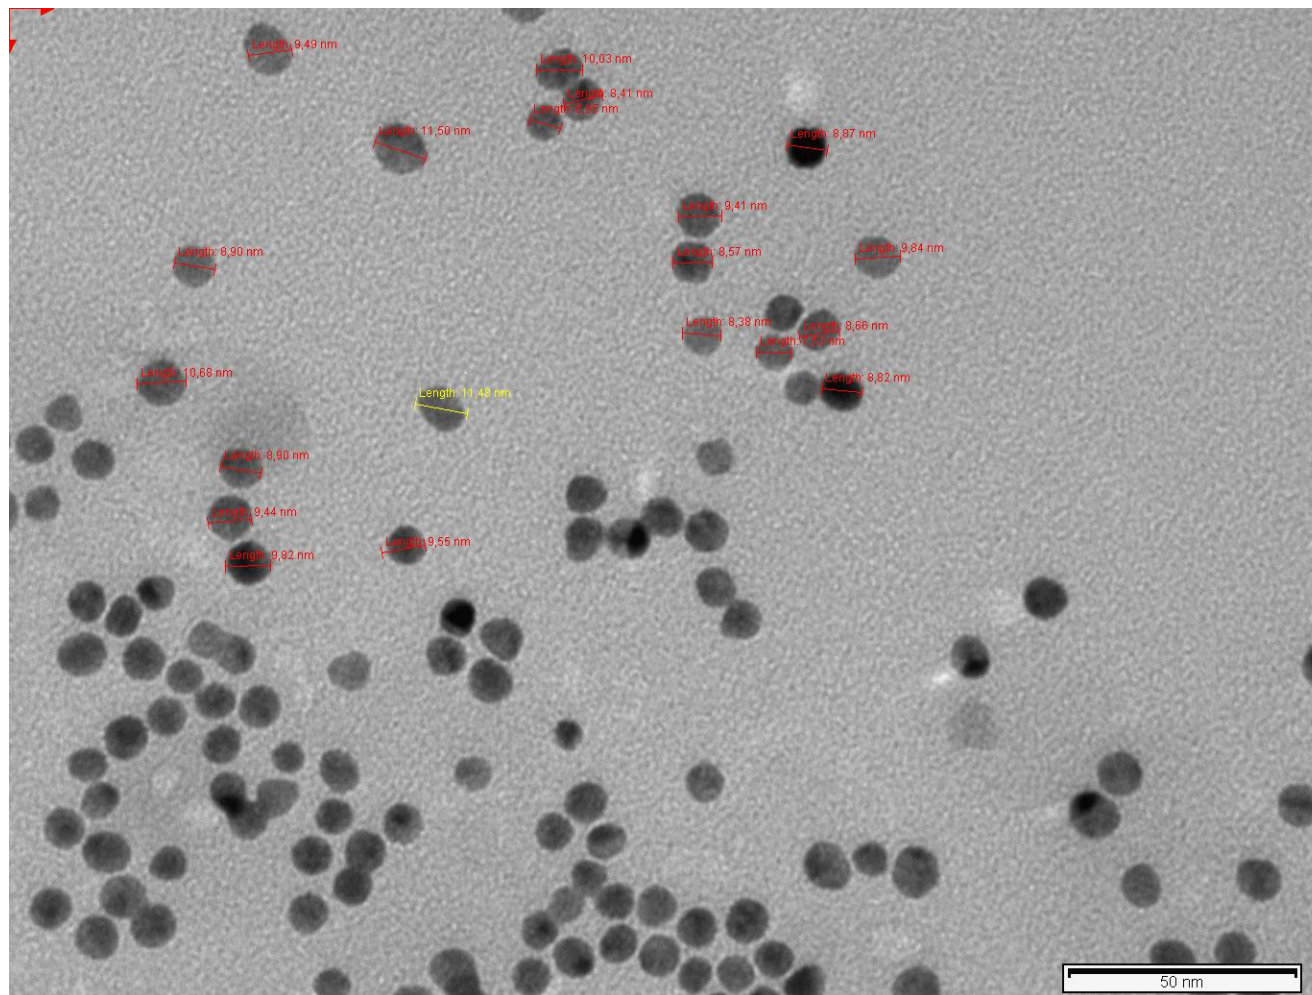

**Figure S2.** TEM image of AuNPs@PC-controls in aqueous phase and the characterization data.

| <b>AuNPs@PC-controls (nm)</b> |       |    |       |
|-------------------------------|-------|----|-------|
| 1                             | 10.52 | 16 | 12.29 |
| 2                             | 10.73 | 17 | 12.33 |
| 3                             | 10.85 | 18 | 12.39 |
| 4                             | 10.97 | 19 | 12.46 |
| 5                             | 10.99 | 20 | 12.63 |
| 6                             | 11.03 | 21 | 12.65 |
| 7                             | 11.32 | 22 | 12.72 |
| 8                             | 11.50 | 23 | 12.77 |
| 9                             | 11.60 | 24 | 12.90 |
| 10                            | 11.72 | 25 | 12.94 |
| 11                            | 11.89 | 26 | 13.04 |
| 12                            | 11.90 | 27 | 13.06 |
| 13                            | 11.94 | 28 | 13.35 |
| 14                            | 12.03 | 29 | 13.54 |
| 15                            | 12.03 | 30 | 15.05 |
| Count                         | 30    |    |       |
| Mean                          | 12.17 |    |       |
| Minimum                       | 10.52 |    |       |
| Maximum                       | 15.05 |    |       |
| Standard Deviation            | 0.98  |    |       |

### AuNPs@PC-controls

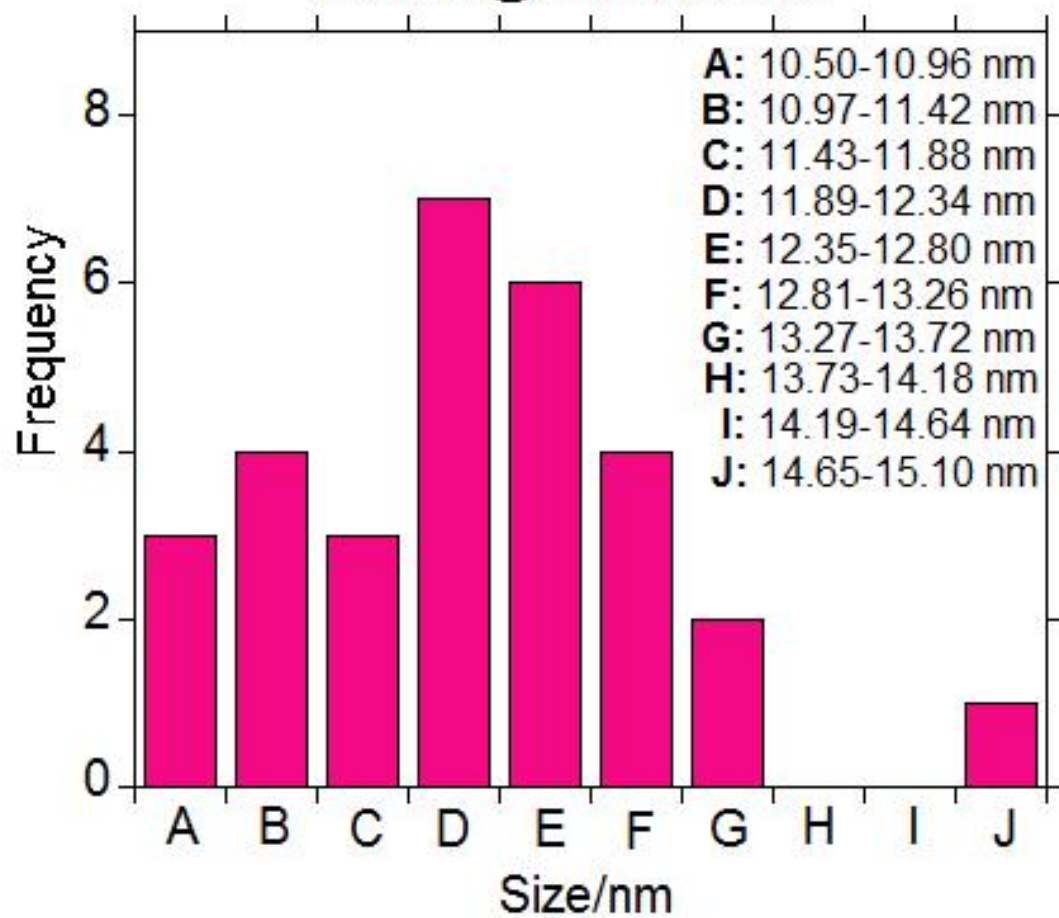

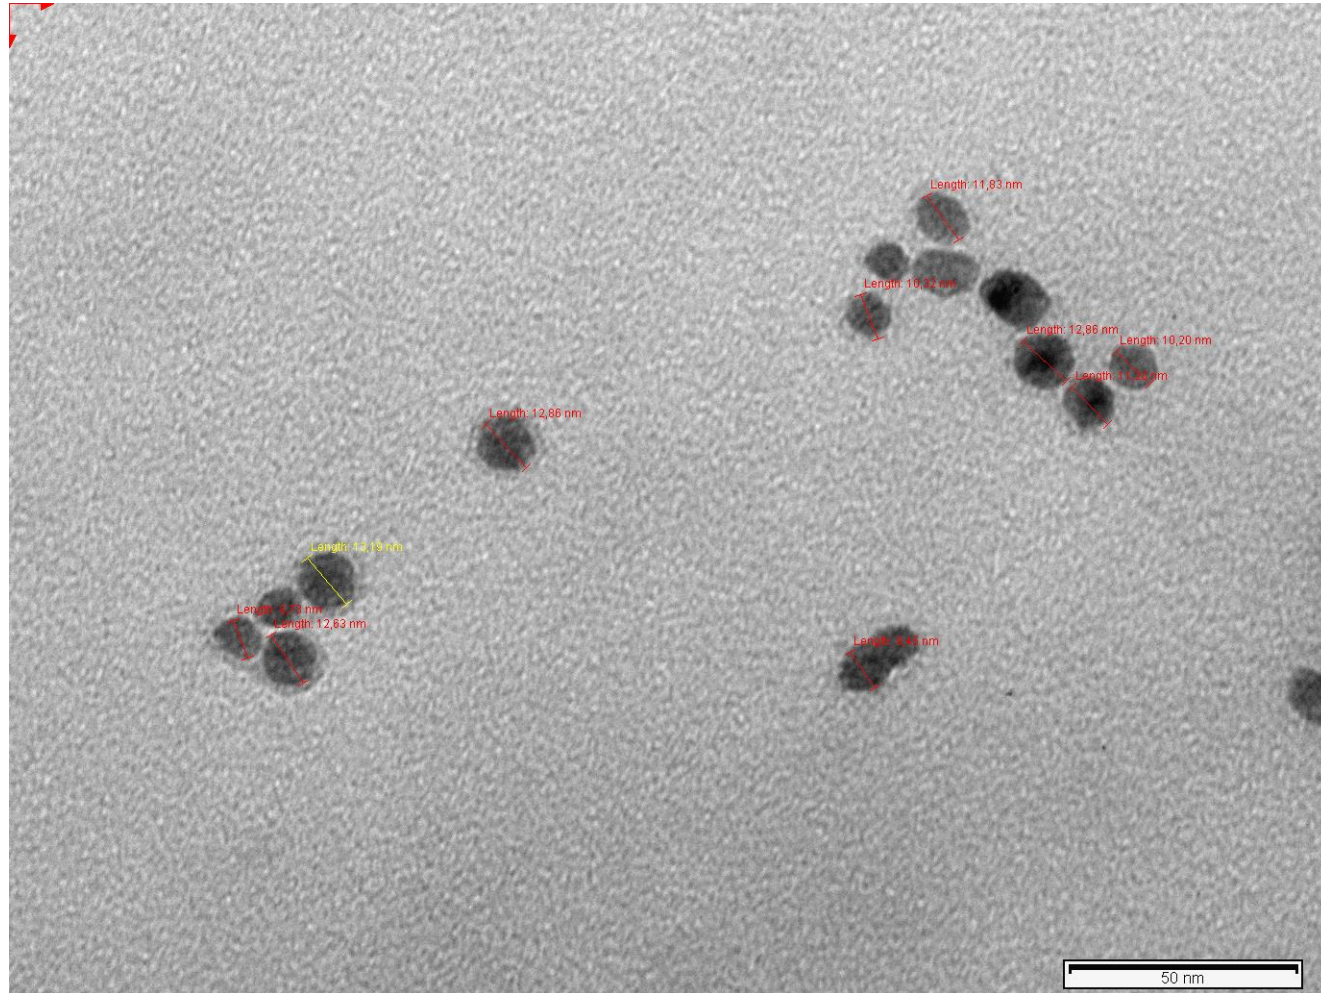

**Figure S3.** TEM image of AuNPs@PC-BC in aqueous phase and the characterization data.

| <b>AuNPs@PC-BC (nm)</b> |       |    |       |
|-------------------------|-------|----|-------|
| 1                       | 10.12 | 16 | 12.32 |
| 2                       | 10.71 | 17 | 12.32 |
| 3                       | 11.09 | 18 | 12.38 |
| 4                       | 11.11 | 19 | 12.47 |
| 5                       | 11.31 | 20 | 12.51 |
| 6                       | 11.45 | 21 | 12.51 |
| 7                       | 11.45 | 22 | 12.53 |
| 8                       | 11.50 | 23 | 12.61 |
| 9                       | 11.74 | 24 | 12.61 |
| 10                      | 11.79 | 25 | 12.62 |
| 11                      | 11.96 | 26 | 12.95 |
| 12                      | 11.98 | 27 | 13.04 |
| 13                      | 11.98 | 28 | 13.31 |
| 14                      | 12.20 | 29 | 13.51 |
| 15                      | 12.32 | 30 | 13.73 |
| Count                   | 30    |    |       |
| Mean                    | 12.14 |    |       |
| Minimum                 | 10.12 |    |       |
| Maximum                 | 13.73 |    |       |
| Standard Deviation      | 0.82  |    |       |



### AuNPs@PC-BC

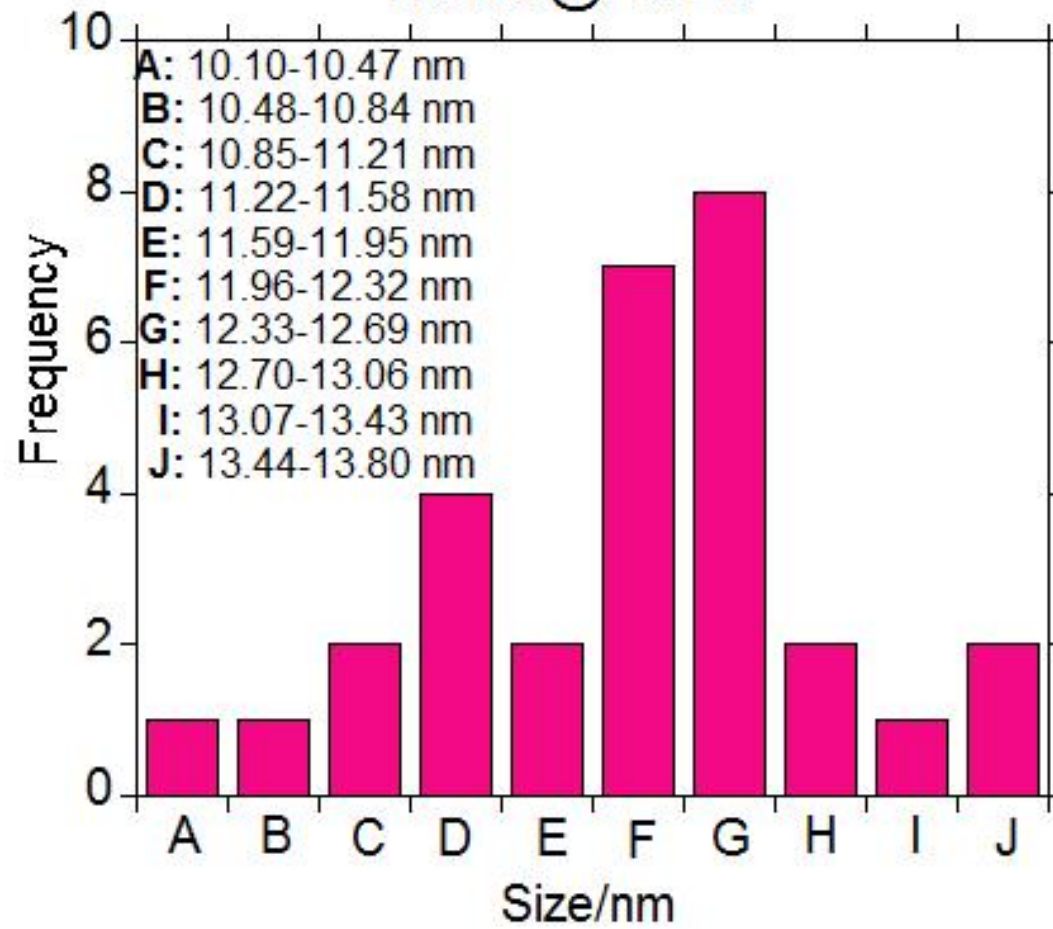

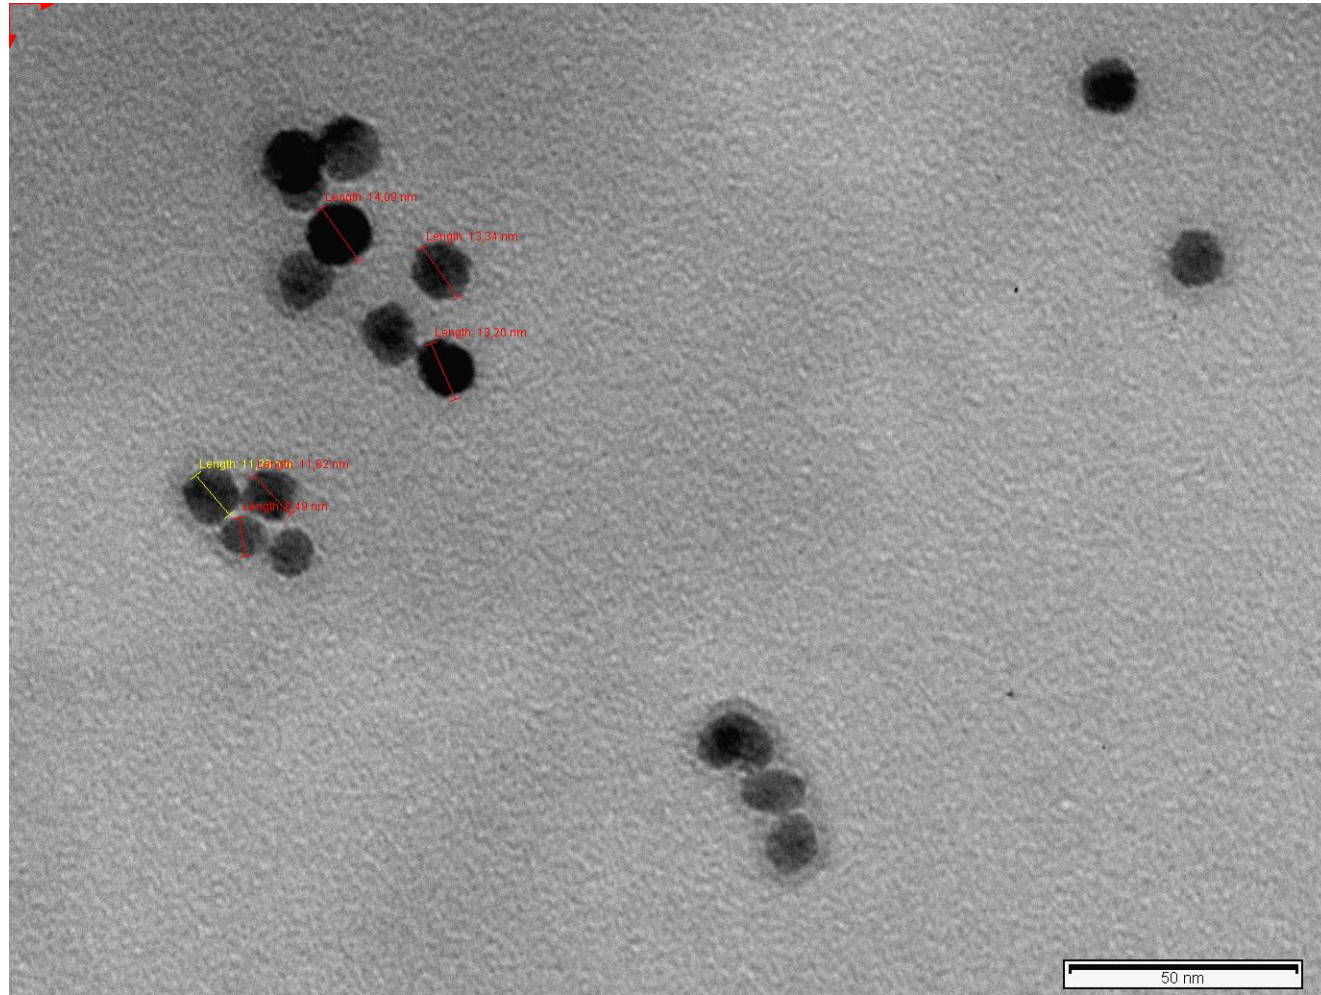

**Figure S4.** Protein-protein interaction network map of the 194 genes encoded differentially proteins identified in the AuNPs-protein corona after the interaction of AuNPs ( $10.02 \pm 0.91$  nm) (30 min, incubation) with serum samples belonging to 42 breast cancer patients.

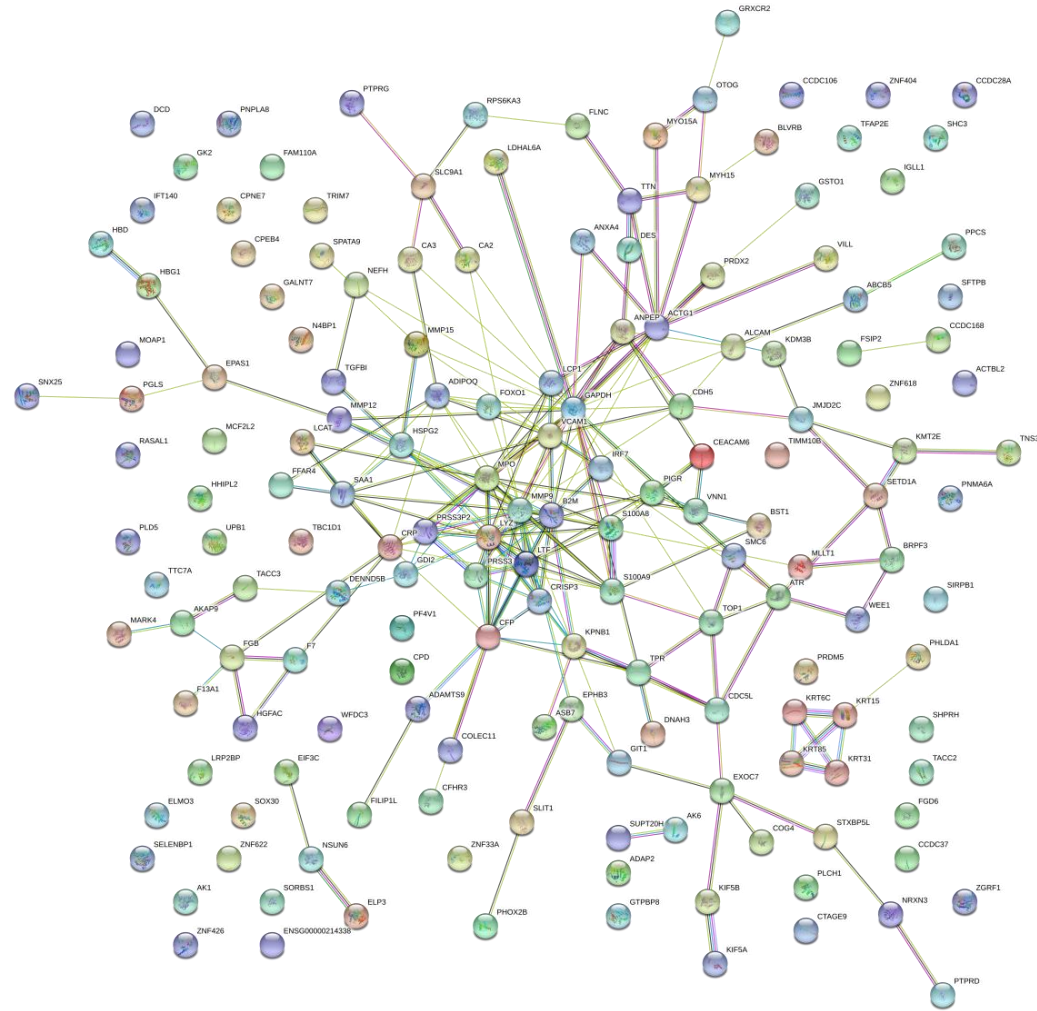

**Table S1.** Number of proteins identified in the protein corona formed after the interaction of AuNPs ( $10.02 \pm 0.91$  nm) (30 min, incubation) with serum samples belonging to 42 healthy women (HC) and 42 breast cancer patients (BC) with different subtypes: luminal A (n = 11), luminal B HER2 negative (n = 10), luminal B HER2 positive (n = 7), HER2 positive (n = 6), and triple negative (n = 8).

| Fraction<br>Classification       | AuNPs-protein corona<br>Number of proteins identified |        |         |
|----------------------------------|-------------------------------------------------------|--------|---------|
|                                  | Total                                                 | Common | Uniques |
| Control (n = 42)                 | 350                                                   | 252    | 98      |
| Luminal A (n = 11)               | 324                                                   |        | 72      |
| Control (n = 42)                 | 350                                                   | 247    | 103     |
| Luminal B HER2 negative (n = 10) | 329                                                   |        | 82      |
| Control (n = 42)                 | 359                                                   | 235    | 115     |
| Luminal B HER2 positive (n = 7)  | 294                                                   |        | 59      |
| Control (n = 42)                 | 350                                                   | 207    | 207     |
| HER2 positive (n = 6)            | 243                                                   |        | 36      |
| Control (n = 42)                 | 350                                                   | 237    | 113     |
| Triple negative (n = 8)          | 296                                                   |        | 59      |

**Table S2.** Proteins identified in the protein corona formed after the interaction of AuNPs ( $10.02 \pm 0.91$  nm) (30 min, incubation) with serum samples belonging to 42 healthy women (HC) and 42 breast cancer patients (BC).

| <b>Protein Name</b>                 | <b>UniProt Name</b> | <b>HC</b> | <b>BC</b> |
|-------------------------------------|---------------------|-----------|-----------|
| Immunoglobulin lambda variable 4-69 | LV469_HUMAN         | X         | X         |
| Immunoglobulin lambda variable 8-61 | LV861_HUMAN         | X         | X         |
| Immunoglobulin lambda variable 4-60 | LV460_HUMAN         | X         | X         |
| Immunoglobulin lambda variable 3-10 | LV310_HUMAN         | X         | X         |
| Immunoglobulin heavy variable 3-64  | HV364_HUMAN         | X         | X         |
| Immunoglobulin heavy variable 4-4   | HV404_HUMAN         | X         | X         |
| Immunoglobulin kappa variable 1-27  | KV127_HUMAN         | X         | X         |
| Immunoglobulin kappa variable 3D-15 | KVD15_HUMAN         | X         | X         |
| Immunoglobulin kappa variable 1D-8  | KVD08_HUMAN         | X         | X         |
| Immunoglobulin heavy variable 3-49  | HV349_HUMAN         | X         | X         |
| Immunoglobulin heavy variable 6-1   | HV601_HUMAN         | X         | X         |
| Immunoglobulin heavy variable 3-15  | HV315_HUMAN         | X         | X         |
| Immunoglobulin heavy variable 2-26  | HV226_HUMAN         | X         | X         |
| Immunoglobulin heavy variable 3-74  | HV374_HUMAN         | X         | X         |
| Immunoglobulin heavy variable 3-43  | HV343_HUMAN         | X         | X         |
| Immunoglobulin lambda variable 9-49 | LV949_HUMAN         | X         | X         |
| Immunoglobulin heavy variable 3-72  | HV372_HUMAN         | X         | X         |
| Immunoglobulin kappa variable 3D-20 | KVD20_HUMAN         | X         | X         |
| Immunoglobulin heavy variable 1-3   | HV103_HUMAN         | X         | X         |
| Immunoglobulin heavy variable 4-28  | HV428_HUMAN         | X         | X         |
| Immunoglobulin heavy variable 5-51  | HV551_HUMAN         | X         | X         |
| Immunoglobulin heavy variable 3-66  | HV366_HUMAN         | X         | X         |

|                                            |             |   |   |
|--------------------------------------------|-------------|---|---|
| Immunoglobulin heavy variable 2-70D        | HV70D_HUMAN | X | X |
| Immunoglobulin kappa variable 2-24         | KV224_HUMAN | X | X |
| Immunoglobulin kappa variable 1-9          | KV109_HUMAN | X | X |
| Immunoglobulin kappa variable 1-6          | KV106_HUMAN | X | X |
| Immunoglobulin lambda variable 5-39        | LV539_HUMAN | X | X |
| Immunoglobulin heavy variable 3-64D        | HV64D_HUMAN | X | X |
| Immunoglobulin heavy variable 5-10-1       | HV5X1_HUMAN | X | X |
| Immunoglobulin lambda constant 7           | IGLC7_HUMAN | X | X |
| Transmembrane protein 223                  | TM223_HUMAN | X | X |
| Immunoglobulin kappa variable 2-29         | KV229_HUMAN | X | X |
| Immunoglobulin lambda-like polypeptide 5   | IGLL5_HUMAN | X | X |
| Mannan-binding lectin serine protease 2    | MASP2_HUMAN | X | X |
| Sulfhydryl oxidase 1                       | QSOX1_HUMAN | X | X |
| Apolipoprotein L1                          | APOL1_HUMAN | X | X |
| CD5 antigen-like                           | CD5L_HUMAN  | X | X |
| Fukutin                                    | FKTN_HUMAN  | X | X |
| Ficolin-3                                  | FCN3_HUMAN  | X | X |
| Attractin                                  | ATRN_HUMAN  | X | X |
| Apolipoprotein M                           | APOM_HUMAN  | X | X |
| Keratin, type II cytoskeletal 75           | K2C75_HUMAN | X | X |
| Apoptosis-inducing factor 1, mitochondrial | AIFM1_HUMAN | X | X |
| L-lactate dehydrogenase A chain            | LDHA_HUMAN  | X | X |
| Ceruloplasmin                              | CERU_HUMAN  | X | X |
| Prothrombin                                | THRB_HUMAN  | X | X |
| Complement C1r subcomponent                | C1R_HUMAN   | X | X |
| Haptoglobin                                | HPT_HUMAN   | X | X |
| Haptoglobin-related protein                | HPTR_HUMAN  | X | X |

|                                     |             |   |   |
|-------------------------------------|-------------|---|---|
| Coagulation factor IX               | FA9_HUMAN   | X | X |
| Coagulation factor X                | FA10_HUMAN  | X | X |
| Complement factor D                 | CFAD_HUMAN  | X | X |
| Plasminogen                         | PLMN_HUMAN  | X | X |
| Coagulation factor XII              | FA12_HUMAN  | X | X |
| Complement factor B                 | CFAB_HUMAN  | X | X |
| Carbonic anhydrase 1                | CAH1_HUMAN  | X | X |
| Antithrombin-III                    | ANT3_HUMAN  | X | X |
| Alpha-1-antitrypsin                 | A1AT_HUMAN  | X | X |
| Alpha-1-antichymotrypsin            | AACT_HUMAN  | X | X |
| Angiotensinogen                     | ANGT_HUMAN  | X | X |
| Alpha-2-macroglobulin               | A2MG_HUMAN  | X | X |
| Complement C3                       | CO3_HUMAN   | X | X |
| Complement C5                       | CO5_HUMAN   | X | X |
| Kininogen-1                         | KNG1_HUMAN  | X | X |
| Immunoglobulin J chain              | IGJ_HUMAN   | X | X |
| Immunoglobulin kappa variable 1-33  | KV133_HUMAN | X | X |
| Immunoglobulin kappa variable 1-17  | KV117_HUMAN | X | X |
| Immunoglobulin kappa variable 1-5   | KV105_HUMAN | X | X |
| Immunoglobulin kappa variable 1D-12 | KVD12_HUMAN | X | X |
| Immunoglobulin kappa variable 2D-28 | KVD28_HUMAN | X | X |
| Immunoglobulin kappa variable 3-20  | KV320_HUMAN | X | X |
| Immunoglobulin kappa variable 3-15  | KV315_HUMAN | X | X |
| Immunoglobulin lambda variable 1-47 | LV147_HUMAN | X | X |
| Immunoglobulin lambda variable 1-51 | LV151_HUMAN | X | X |
| Immunoglobulin lambda variable 1-40 | LV140_HUMAN | X | X |
| Immunoglobulin lambda variable 2-23 | LV223_HUMAN | X | X |

|                                       |             |   |   |
|---------------------------------------|-------------|---|---|
| Immunoglobulin lambda variable 2-11   | LV211_HUMAN | X | X |
| Immunoglobulin lambda variable 2-8    | LV208_HUMAN | X | X |
| Immunoglobulin lambda variable 3-19   | LV319_HUMAN | X | X |
| Immunoglobulin lambda variable 3-25   | LV325_HUMAN | X | X |
| Immunoglobulin lambda variable 3-27   | LV327_HUMAN | X | X |
| Immunoglobulin heavy variable 1-69    | HV169_HUMAN | X | X |
| Immunoglobulin heavy variable 1-46    | HV146_HUMAN | X | X |
| Immunoglobulin heavy variable 3-23    | HV323_HUMAN | X | X |
| Immunoglobulin heavy variable 3-7     | HV307_HUMAN | X | X |
| Immunoglobulin heavy variable 3-9     | HV309_HUMAN | X | X |
| Immunoglobulin heavy variable 2-5     | HV205_HUMAN | X | X |
| Immunoglobulin heavy variable 4-59    | HV459_HUMAN | X | X |
| Immunoglobulin kappa constant         | IGKC_HUMAN  | X | X |
| Immunoglobulin heavy constant gamma 1 | IGHG1_HUMAN | X | X |
| Immunoglobulin heavy constant gamma 2 | IGHG2_HUMAN | X | X |
| Immunoglobulin heavy constant gamma 3 | IGHG3_HUMAN | X | X |
| Immunoglobulin heavy constant gamma 4 | IGHG4_HUMAN | X | X |
| Immunoglobulin heavy constant mu      | IGHM_HUMAN  | X | X |
| Immunoglobulin heavy constant alpha 1 | IGHA1_HUMAN | X | X |
| Immunoglobulin heavy constant alpha 2 | IGHA2_HUMAN | X | X |
| Immunoglobulin heavy constant delta   | IGHD_HUMAN  | X | X |
| Keratin, type I cytoskeletal 14       | K1C14_HUMAN | X | X |
| Apolipoprotein A-I                    | APOA1_HUMAN | X | X |
| Apolipoprotein E                      | APOE_HUMAN  | X | X |
| Apolipoprotein A-II                   | APOA2_HUMAN | X | X |
| Apolipoprotein C-I                    | APOC1_HUMAN | X | X |
| Apolipoprotein C-II                   | APOC2_HUMAN | X | X |



|                                       |             |   |   |
|---------------------------------------|-------------|---|---|
| Apolipoprotein C-III                  | APOC3_HUMAN | X | X |
| Fibrinogen alpha chain                | FIBA_HUMAN  | X | X |
| Fibrinogen gamma chain                | FIBG_HUMAN  | X | X |
| Serum amyloid P-component             | SAMP_HUMAN  | X | X |
| Complement C1q subcomponent subunit A | C1QA_HUMAN  | X | X |
| Complement C1q subcomponent subunit B | C1QB_HUMAN  | X | X |
| Complement C1q subcomponent subunit C | C1QC_HUMAN  | X | X |
| Complement component C9               | CO9_HUMAN   | X | X |
| Beta-2-glycoprotein 1                 | APOH_HUMAN  | X | X |
| Leucine-rich alpha-2-glycoprotein     | A2GL_HUMAN  | X | X |
| Fibronectin                           | FINC_HUMAN  | X | X |
| Retinol-binding protein 4             | RET4_HUMAN  | X | X |
| Protein AMBP                          | AMBP_HUMAN  | X | X |
| Alpha-1-acid glycoprotein 1           | A1AG1_HUMAN | X | X |
| Alpha-2-HS-glycoprotein               | FETUA_HUMAN | X | X |
| Transthyretin                         | TTHY_HUMAN  | X | X |
| Serum albumin                         | ALBU_HUMAN  | X | X |
| Vitamin D-binding protein             | VTDB_HUMAN  | X | X |
| Platelet basic protein                | CXCL7_HUMAN | X | X |
| Transferrin receptor protein 1        | TFR1_HUMAN  | X | X |
| Serotransferrin                       | TRFE_HUMAN  | X | X |
| Hemopexin                             | HEMO_HUMAN  | X | X |
| Plasma kallikrein                     | KLKB1_HUMAN | X | X |
| C4b-binding protein alpha chain       | C4BPA_HUMAN | X | X |
| Vitronectin                           | VTNC_HUMAN  | X | X |
| Vitamin K-dependent protein C         | PROC_HUMAN  | X | X |
| Apolipoprotein B-100                  | APOB_HUMAN  | X | X |

|                                     |             |   |   |
|-------------------------------------|-------------|---|---|
| Histidine-rich glycoprotein         | HRG_HUMAN   | X | X |
| Immunoglobulin lambda variable 7-43 | LV743_HUMAN | X | X |
| Alpha-1B-glycoprotein               | A1BG_HUMAN  | X | X |
| Keratin, type II cytoskeletal 6B    | K2C6B_HUMAN | X | X |
| Keratin, type II cytoskeletal 1     | K2C1_HUMAN  | X | X |
| von Willebrand factor               | VWF_HUMAN   | X | X |
| Sex hormone-binding globulin        | SHBG_HUMAN  | X | X |
| Immunoglobulin kappa variable 1D-39 | KVD39_HUMAN | X | X |
| Immunoglobulin kappa variable 3-11  | KV311_HUMAN | X | X |
| Apolipoprotein D                    | APOD_HUMAN  | X | X |
| Plasma serine protease inhibitor    | IPSP_HUMAN  | X | X |
| Plasma protease C1 inhibitor        | IC1_HUMAN   | X | X |
| Complement factor I                 | CFAI_HUMAN  | X | X |
| Coagulation factor XIII B chain     | F13B_HUMAN  | X | X |
| Tetranectin                         | TETN_HUMAN  | X | X |
| Thyroxine-binding globulin          | THBG_HUMAN  | X | X |
| Heparin cofactor 2                  | HEP2_HUMAN  | X | X |
| Cholinesterase                      | CHLE_HUMAN  | X | X |
| Immunoglobulin kappa variable 2-30  | KV230_HUMAN | X | X |
| Immunoglobulin kappa variable 4-1   | KV401_HUMAN | X | X |
| Immunoglobulin heavy variable 4-34  | HV434_HUMAN | X | X |
| Gelsolin                            | GELS_HUMAN  | X | X |
| Complement C2                       | CO2_HUMAN   | X | X |
| Apolipoprotein A-IV                 | APOA4_HUMAN | X | X |
| L-lactate dehydrogenase B chain     | LDHB_HUMAN  | X | X |
| Vitamin K-dependent protein S       | PROS_HUMAN  | X | X |
| Complement component C8 alpha chain | CO8A_HUMAN  | X | X |

|                                       |             |   |   |
|---------------------------------------|-------------|---|---|
| Complement component C8 beta chain    | CO8B_HUMAN  | X | X |
| Platelet glycoprotein Ib alpha chain  | GP1BA_HUMAN | X | X |
| Complement component C8 gamma chain   | CO8G_HUMAN  | X | X |
| Trypsin-1                             | TRY1_HUMAN  | X | X |
| Thrombospondin-1                      | TSP1_HUMAN  | X | X |
| Corticosteroid-binding globulin       | CBG_HUMAN   | X | X |
| Apolipoprotein(a)                     | APOA_HUMAN  | X | X |
| Monocyte differentiation antigen CD14 | CD14_HUMAN  | X | X |
| Complement factor H                   | CFAH_HUMAN  | X | X |
| Alpha-2-antiplasmin                   | A2AP_HUMAN  | X | X |
| Keratin, type I cytoskeletal 16       | K1C16_HUMAN | X | X |
| Dopamine beta-hydroxylase             | DOPO_HUMAN  | X | X |
| SPARC                                 | SPRC_HUMAN  | X | X |
| Complement C1s subcomponent           | C1S_HUMAN   | X | X |
| Complement C4-A                       | CO4A_HUMAN  | X | X |
| Complement C4-B                       | CO4B_HUMAN  | X | X |
| Serum amyloid A-2 protein             | SAA2_HUMAN  | X | X |
| Immunoglobulin lambda constant 2      | IGLC2_HUMAN | X | X |
| Immunoglobulin lambda constant 3      | IGLC3_HUMAN | X | X |
| Immunoglobulin heavy variable 1-8     | HV108_HUMAN | X | X |
| Immunoglobulin heavy variable 3-30-3  | HVC33_HUMAN | X | X |
| Immunoglobulin heavy variable 3-30-5  | HV335_HUMAN | X | X |
| Immunoglobulin heavy variable 3-43D   | HV43D_HUMAN | X | X |
| Immunoglobulin heavy variable 4-38-2  | HVD82_HUMAN | X | X |
| Immunoglobulin kappa variable 1-13    | KV113_HUMAN | X | X |
| Complement component C7               | CO7_HUMAN   | X | X |
| Clusterin                             | CLUS_HUMAN  | X | X |

|                                                                   |             |   |   |
|-------------------------------------------------------------------|-------------|---|---|
| Solute carrier family 2, facilitated glucose transporter member 2 | GTR2_HUMAN  | X | X |
| Cholesteryl ester transfer protein                                | CETP_HUMAN  | X | X |
| Coagulation factor V                                              | FA5_HUMAN   | X | X |
| Lysosome-associated membrane glycoprotein 2                       | LAMP2_HUMAN | X | X |
| Keratin, type I cytoskeletal 10                                   | K1C10_HUMAN | X | X |
| Keratin, type II cytoskeletal 5                                   | K2C5_HUMAN  | X | X |
| Complement component C6                                           | CO6_HUMAN   | X | X |
| L-selectin                                                        | LYAM1_HUMAN | X | X |
| Carboxypeptidase N catalytic chain                                | CBPN_HUMAN  | X | X |
| CD44 antigen                                                      | CD44_HUMAN  | X | X |
| Lipopolysaccharide-binding protein                                | LBP_HUMAN   | X | X |
| Alpha-1-acid glycoprotein 2                                       | A1AG2_HUMAN | X | X |
| Inter-alpha-trypsin inhibitor heavy chain H2                      | ITIH2_HUMAN | X | X |
| Inter-alpha-trypsin inhibitor heavy chain H1                      | ITIH1_HUMAN | X | X |
| Pregnancy zone protein                                            | PZP_HUMAN   | X | X |
| C4b-binding protein beta chain                                    | C4BPB_HUMAN | X | X |
| Glutathione peroxidase 3                                          | GPX3_HUMAN  | X | X |
| Carboxypeptidase N subunit 2                                      | CPN2_HUMAN  | X | X |
| Vitamin K-dependent protein Z                                     | PROZ_HUMAN  | X | X |
| Fibulin-1                                                         | FBLN1_HUMAN | X | X |
| Zinc-alpha-2-glycoprotein                                         | ZA2G_HUMAN  | X | X |
| Hepatocyte growth factor-like protein                             | HGFL_HUMAN  | X | X |
| Serum paraoxonase/arylesterase 1                                  | PON1_HUMAN  | X | X |
| Kallistatin                                                       | KAIN_HUMAN  | X | X |
| Mannosyl-oligosaccharide 1,2-alpha-mannosidase IA                 | MA1A1_HUMAN | X | X |

|                                                                        |             |   |   |
|------------------------------------------------------------------------|-------------|---|---|
| Thrombospondin-4                                                       | TSP4_HUMAN  | X | X |
| Keratin, type I cytoskeletal 9                                         | K1C9_HUMAN  | X | X |
| Serum amyloid A-4 protein                                              | SAA4_HUMAN  | X | X |
| Insulin-like growth factor-binding protein complex acid labile subunit | ALS_HUMAN   | X | X |
| Keratin, type II cytoskeletal 2 epidermal                              | K22E_HUMAN  | X | X |
| Pigment epithelium-derived factor                                      | PEDF_HUMAN  | X | X |
| Complement factor H-related protein 2                                  | FHR2_HUMAN  | X | X |
| Platelet glycoprotein V                                                | GPV_HUMAN   | X | X |
| Biotinidase                                                            | BTD_HUMAN   | X | X |
| Afamin                                                                 | AFAM_HUMAN  | X | X |
| Mannan-binding lectin serine protease 1                                | MASP1_HUMAN | X | X |
| Cartilage oligomeric matrix protein                                    | COMP_HUMAN  | X | X |
| Selenoprotein P                                                        | SEPP1_HUMAN | X | X |
| Cathelicidin antimicrobial peptide                                     | CAMP_HUMAN  | X | X |
| Lumican                                                                | LUM_HUMAN   | X | X |
| Alpha-N-acetylglucosaminidase                                          | ANAG_HUMAN  | X | X |
| Apolipoprotein C-IV                                                    | APOC4_HUMAN | X | X |
| Phospholipid transfer protein                                          | PLTP_HUMAN  | X | X |
| Hemoglobin subunit beta                                                | HBB_HUMAN   | X | X |
| Hemoglobin subunit alpha                                               | HBA_HUMAN   | X | X |
| Phosphatidylinositol-glycan-specific phospholipase D                   | PHLD_HUMAN  | X | X |
| Immunoglobulin lambda variable 3-21                                    | LV321_HUMAN | X | X |
| Complement factor H-related protein 1                                  | FHR1_HUMAN  | X | X |
| Inter-alpha-trypsin inhibitor heavy chain H3                           | ITIH3_HUMAN | X | X |
| Galectin-3-binding protein                                             | LG3BP_HUMAN | X | X |

|                                                             |             |   |   |
|-------------------------------------------------------------|-------------|---|---|
| EGF-containing fibulin-like extracellular matrix protein 1  | FBLN3_HUMAN | X | X |
| Platelet-activating factor acetylhydrolase                  | PAFA_HUMAN  | X | X |
| Lymphocyte cytosolic protein 2                              | LCP2_HUMAN  | X | X |
| Secreted phosphoprotein 24                                  | SPP24_HUMAN | X | X |
| Apolipoprotein F                                            | APOF_HUMAN  | X | X |
| UDP-glucose 4-epimerase                                     | GALE_HUMAN  | X | X |
| Hyaluronan-binding protein 2                                | HABP2_HUMAN | X | X |
| Keratin, type II cuticular Hb1                              | KRT81_HUMAN | X | X |
| Inter-alpha-trypsin inhibitor heavy chain H4                | ITIH4_HUMAN | X | X |
| Serum paraoxonase/lactonase 3                               | PON3_HUMAN  | X | X |
| Ficolin-2                                                   | FCN2_HUMAN  | X | X |
| Extracellular matrix protein 1                              | ECM1_HUMAN  | X | X |
| Brefeldin A-inhibited guanine nucleotide-exchange protein 3 | BIG3_HUMAN  | X | X |
| Transmembrane protein 198                                   | TM198_HUMAN | X | X |
| HAUS augmin-like complex subunit 3                          | HAUS3_HUMAN | X | X |
| Peptidase inhibitor 16                                      | PI16_HUMAN  | X | X |
| ATP-binding cassette sub-family F member 1                  | ABCF1_HUMAN | X | X |
| Dynein assembly factor 1, axonemal                          | DAAF1_HUMAN | X | X |
| Protein Shroom3                                             | SHRM3_HUMAN | X | X |
| Complement factor H-related protein 4                       | FHR4_HUMAN  | X | X |
| Proteoglycan 4                                              | PRG4_HUMAN  | X | X |
| Carboxypeptidase B2                                         | CBPB2_HUMAN | X | X |
| RBPJ-interacting and tubulin-associated protein 1           | RITA1_HUMAN | X | X |
| Beta-Ala-His dipeptidase                                    | CNDP1_HUMAN | X | X |
| N-acetylmuramoyl-L-alanine amidase                          | PGRP2_HUMAN | X | X |

|                                                         |             |   |   |
|---------------------------------------------------------|-------------|---|---|
| Lysosomal-trafficking regulator                         | LYST_HUMAN  | X | X |
| Endophilin-A3                                           | SH3G3_HUMAN | X | X |
| Tudor domain-containing protein 1                       | TDRD1_HUMAN | X | X |
| E3 ubiquitin-protein ligase TRIM4                       | TRIM4_HUMAN | X | X |
| Zinc finger protein 350                                 | ZN350_HUMAN | X | X |
| Adipocyte plasma membrane-associated protein            | APMAP_HUMAN | X | X |
| Interleukin-1 receptor accessory protein                | IL1AP_HUMAN | X | X |
| Cartilage acidic protein 1                              | CRAC1_HUMAN | X | X |
| Complement C1r subcomponent-like protein                | C1RL_HUMAN  | X | X |
| Fetuin-B                                                | FETUB_HUMAN | X | X |
| Prenylcysteine oxidase 1                                | PCYOX_HUMAN | X | X |
| Protein Z-dependent protease inhibitor                  | ZPI_HUMAN   | X | X |
| Mediator of RNA polymerase II transcription subunit 23  | MED23_HUMAN | X | X |
| Multiple inositol polyphosphate phosphatase 1           | MINP1_HUMAN | X | X |
| Glypican-6                                              | GPC6_HUMAN  | X | X |
| IgGfc-binding protein                                   | FCGBP_HUMAN | X | X |
| Immunoglobulin lambda variable 5-52                     | LV552_HUMAN | X |   |
| Immunoglobulin kappa joining 1                          | KJ01_HUMAN  | X |   |
| Immunoglobulin kappa variable 3D-7                      | KVD07_HUMAN | X |   |
| Endoribonuclease Dicer                                  | DICER_HUMAN | X |   |
| Dynamin-3                                               | DYN3_HUMAN  | X |   |
| Receptor-interacting serine/threonine-protein kinase 3  | RIPK3_HUMAN | X |   |
| Transportin-3                                           | TNPO3_HUMAN | X |   |
| Lymphatic vessel endothelial hyaluronic acid receptor 1 | LYVE1_HUMAN | X |   |

|                                                                 |             |   |  |
|-----------------------------------------------------------------|-------------|---|--|
| Cathepsin Z                                                     | CATZ_HUMAN  | X |  |
| PHD and RING finger domain-containing protein 1                 | PHRF1_HUMAN | X |  |
| Dynein heavy chain 2, axonemal                                  | DYH2_HUMAN  | X |  |
| Teneurin-3                                                      | TEN3_HUMAN  | X |  |
| Zinc finger C4H2 domain-containing protein                      | ZC4H2_HUMAN | X |  |
| Dapper homolog 1                                                | DACT1_HUMAN | X |  |
| CASP8-associated protein 2                                      | C8AP2_HUMAN | X |  |
| Kinesin-like protein KIF13A                                     | KI13A_HUMAN | X |  |
| Band 4.1-like protein 4B                                        | E41LB_HUMAN | X |  |
| Threonine aspartase 1                                           | TASP1_HUMAN | X |  |
| Junctophilin-1                                                  | JPH1_HUMAN  | X |  |
| Leucine-rich repeat-containing protein 27                       | LRC27_HUMAN | X |  |
| Succinyl-CoA:3-ketoacid coenzyme A transferase 2, mitochondrial | SCOT2_HUMAN | X |  |
| Calcium-binding mitochondrial carrier protein SCaMC-3           | SCMC3_HUMAN | X |  |
| Matrix metalloproteinase-19                                     | MMP19_HUMAN | X |  |
| HIRA-interacting protein 3                                      | HIRP3_HUMAN | X |  |
| Cell division control protein 6 homolog                         | CDC6_HUMAN  | X |  |
| Zinc finger protein 184                                         | ZN184_HUMAN | X |  |
| RNA-binding protein 14                                          | RBM14_HUMAN | X |  |
| Hemicentin-1                                                    | HMCN1_HUMAN | X |  |
| CDK5 regulatory subunit-associated protein 2                    | CK5P2_HUMAN | X |  |
| T-cell immunoglobulin and mucin domain-containing protein 4     | TIMD4_HUMAN | X |  |
| Succinate--CoA ligase [GDP-forming] subunit beta, mitochondrial | SUCB2_HUMAN | X |  |
| Putative transmembrane protein encoded by LINC00477             | CL067_HUMAN | X |  |



|                                                            |             |   |  |
|------------------------------------------------------------|-------------|---|--|
| Keratin, type I cuticular Ha5                              | KRT35_HUMAN | X |  |
| Sodium-dependent phosphate transporter 1                   | S20A1_HUMAN | X |  |
| InaD-like protein                                          | INADL_HUMAN | X |  |
| BPI fold-containing family B member 1                      | BPIB1_HUMAN | X |  |
| FERM domain-containing protein 5                           | FRMD5_HUMAN | X |  |
| Coiled-coil domain-containing protein 25                   | CCD25_HUMAN | X |  |
| Cardiomyopathy-associated protein 5                        | CMYA5_HUMAN | X |  |
| Leucine-rich repeat-containing protein 18                  | LRC18_HUMAN | X |  |
| APC membrane recruitment protein 2                         | AMER2_HUMAN | X |  |
| Myogenesis-regulating glycosidase                          | MYORG_HUMAN | X |  |
| NIPA-like protein 3                                        | NPAL3_HUMAN | X |  |
| Plexin domain-containing protein 2                         | PXDC2_HUMAN | X |  |
| Nephrocystin-3                                             | NPHP3_HUMAN | X |  |
| Dual specificity mitogen-activated protein kinase kinase 7 | MP2K7_HUMAN | X |  |
| ATP synthase mitochondrial F1 complex assembly factor 1    | ATPF1_HUMAN | X |  |
| Keratin, type II cytoskeletal 79                           | K2C79_HUMAN | X |  |
| RNA-binding motif, single-stranded-interacting protein 2   | RBMS2_HUMAN | X |  |
| Nuclear receptor coactivator 1                             | NCOA1_HUMAN | X |  |
| Laminin subunit alpha-4                                    | LAMA4_HUMAN | X |  |
| Nuclear mitotic apparatus protein 1                        | NUMA1_HUMAN | X |  |
| Calicin                                                    | CALI_HUMAN  | X |  |
| Tubulin--tyrosine ligase-like protein 12                   | TTL12_HUMAN | X |  |
| Metabotropic glutamate receptor 1                          | GRM1_HUMAN  | X |  |
| AP-3 complex subunit beta-2                                | AP3B2_HUMAN | X |  |
| Mucin-2                                                    | MUC2_HUMAN  | X |  |
| Dystonin                                                   | DYST_HUMAN  | X |  |

|                                                      |             |   |   |
|------------------------------------------------------|-------------|---|---|
| Prolyl endopeptidase FAP                             | SEPR_HUMAN  | X |   |
| Immunoglobulin lambda constant 6                     | IGLC6_HUMAN | X |   |
| Immunoglobulin lambda constant 1                     | IGLC1_HUMAN | X |   |
| Plasminogen-like protein A                           | PLGA_HUMAN  | X |   |
| Oxygen-regulated protein 1                           | RP1_HUMAN   | X |   |
| Putative macrophage stimulating 1-like protein       | MST1L_HUMAN | X |   |
| Tenascin-X                                           | TENX_HUMAN  | X |   |
| ATP-binding cassette sub-family C member 8           | ABCC8_HUMAN | X |   |
| Keratin, type I cytoskeletal 17                      | K1C17_HUMAN | X |   |
| Huntingtin                                           | HD_HUMAN    | X |   |
| E-selectin                                           | LYAM2_HUMAN | X |   |
| Transcription factor jun-B                           | JUNB_HUMAN  | X |   |
| Collagen alpha-1(XVIII) chain                        | CO1A1_HUMAN | X |   |
| Collagen alpha-3(VI) chain                           | CO6A3_HUMAN | X |   |
| Synaptobrevin homolog YKT6                           | YKT6_HUMAN  | X |   |
| Glutathione S-transferase theta-1                    | GSTT1_HUMAN | X |   |
| Nuclear receptor corepressor 1                       | NCOR1_HUMAN | X |   |
| Properdin                                            | PROP_HUMAN  |   | X |
| Immunoglobulin heavy variable 1-2                    | HV102_HUMAN |   | X |
| Phosphatidylcholine-sterol acyltransferase           | LCAT_HUMAN  |   | X |
| Cadherin-5                                           | CADH5_HUMAN |   | X |
| Actin, cytoplasmic 2                                 | ACTG_HUMAN  |   | X |
| Transforming acidic coiled-coil-containing protein 3 | TACC3_HUMAN |   | X |
| Immunoglobulin heavy variable 1-18                   | HV118_HUMAN |   | X |
| Immunoglobulin lambda-like polypeptide 1             | IPLL1_HUMAN |   | X |
| Serum amyloid A-1 protein                            | SAA1_HUMAN  |   | X |
| Lysine-specific demethylase 4C                       | KDM4C_HUMAN |   | X |
| Immunoglobulin lambda variable 6-57                  | LV657_HUMAN |   | X |

|                                                                      |             |  |   |
|----------------------------------------------------------------------|-------------|--|---|
| Slit homolog 1 protein                                               | SLIT1_HUMAN |  | X |
| Immunoglobulin kappa variable 1-16                                   | KV116_HUMAN |  | X |
| Immunoglobulin kappa variable 6D-21                                  | KVD21_HUMAN |  | X |
| Matrix metalloproteinase-9                                           | MMP9_HUMAN  |  | X |
| Coagulation factor XIII A chain                                      | F13A_HUMAN  |  | X |
| Immunoglobulin heavy variable 3-13                                   | HV313_HUMAN |  | X |
| Basement membrane-specific heparan sulfate proteoglycan core protein | PGBM_HUMAN  |  | X |
| Filamin-C                                                            | FLNC_HUMAN  |  | X |
| Immunoglobulin kappa variable 1D-16                                  | KVD16_HUMAN |  | X |
| Protein SOGA3                                                        | SOGA3_HUMAN |  | X |
| Pantetheinase                                                        | VNN1_HUMAN  |  | X |
| Polymeric immunoglobulin receptor                                    | PIGR_HUMAN  |  | X |
| Platelet factor 4 variant                                            | PF4V_HUMAN  |  | X |
| Hepatocyte growth factor activator                                   | HGFA_HUMAN  |  | X |
| Villin-like protein                                                  | VILL_HUMAN  |  | X |
| Mitochondrial import inner membrane translocase subunit Tim10 B      | T10B_HUMAN  |  | X |
| Carbonic anhydrase 2                                                 | CAH2_HUMAN  |  | X |
| Immunoglobulin kappa variable 6-21                                   | KV621_HUMAN |  | X |
| Beta-2-microglobulin                                                 | B2MG_HUMAN  |  | X |
| Engulfment and cell motility protein 3                               | ELMO3_HUMAN |  | X |
| Immunoglobulin lambda variable 2-14                                  | LV214_HUMAN |  | X |
| Immunoglobulin heavy variable 4-30-4                                 | HVD34_HUMAN |  | X |
| E3 ubiquitin-protein ligase SHPRH                                    | SHPRH_HUMAN |  | X |
| Vascular cell adhesion protein 1                                     | VCAM1_HUMAN |  | X |
| Collectin-11                                                         | COL11_HUMAN |  | X |

|                                                                  |             |  |   |
|------------------------------------------------------------------|-------------|--|---|
| Immunoglobulin heavy variable 4-31                               | HV431_HUMAN |  | X |
| Tubulin polyglutamylase TTL13P                                   | TTL13_HUMAN |  | X |
| Trypsin-2                                                        | TRY2_HUMAN  |  | X |
| Zinc finger protein 618                                          | ZN618_HUMAN |  | X |
| N-acetylgalactosaminyltransferase 7                              | GALT7_HUMAN |  | X |
| Cell division cycle 5-like protein                               | CDC5L_HUMAN |  | X |
| Paired mesoderm homeobox protein 2B                              | PHX2B_HUMAN |  | X |
| Zinc finger protein 33A                                          | ZN33A_HUMAN |  | X |
| Lactotransferrin                                                 | TRFL_HUMAN  |  | X |
| Serine/threonine-protein kinase ATR                              | ATR_HUMAN   |  | X |
| A disintegrin and metalloproteinase with thrombospondin motifs 9 | ATS9_HUMAN  |  | X |
| Immunoglobulin lambda variable 5-45                              | LV545_HUMAN |  | X |
| Immunoglobulin lambda variable 2-18                              | LV218_HUMAN |  | X |
| Keratin, type II cuticular Hb5                                   | KRT85_HUMAN |  | X |
| Immunoglobulin heavy variable 3-33                               | HV333_HUMAN |  | X |
| Glycerol kinase 2                                                | GLPK2_HUMAN |  | X |
| Calcium-independent phospholipase A2-gamma                       | PLPL8_HUMAN |  | X |
| Beta-ureidopropionase                                            | BUP1_HUMAN  |  | X |
| ARF GTPase-activating protein GIT1                               | GIT1_HUMAN  |  | X |
| Transcription factor SOX-30                                      | SOX30_HUMAN |  | X |
| Forkhead box protein O1                                          | FOXO1_HUMAN |  | X |
| Complement factor H-related protein 3                            | FHR3_HUMAN  |  | X |
| RasGAP-activating-like protein 1                                 | RASL1_HUMAN |  | X |
| DENN domain-containing protein 5B                                | DEN5B_HUMAN |  | X |
| Signal-regulatory protein beta-1                                 | SIRB1_HUMAN |  | X |
| Immunoglobulin lambda variable 7-46                              | LV746_HUMAN |  | X |

|                                                       |             |  |   |
|-------------------------------------------------------|-------------|--|---|
| Trypsin-3                                             | TRY3_HUMAN  |  | X |
| Transforming growth factor-beta-induced protein ig-h3 | BGH3_HUMAN  |  | X |
| Lysozyme C                                            | LYSC_HUMAN  |  | X |
| C-reactive protein                                    | CRP_HUMAN   |  | X |
| Filamin A-interacting protein 1-like                  | FIL1L_HUMAN |  | X |
| ADP-ribosyl cyclase/cyclic ADP-ribose hydrolase 2     | BST1_HUMAN  |  | X |
| Transcription factor AP-2-epsilon                     | AP2E_HUMAN  |  | X |
| Exocyst complex component 7                           | EXOC7_HUMAN |  | X |
| Eukaryotic translation initiation factor 3 subunit C  | EIF3C_HUMAN |  | X |
| Uncharacterized protein FLJ45252                      | YJ005_HUMAN |  | X |
| Titin                                                 | TITIN_HUMAN |  | X |
| Wee1-like protein kinase                              | WEE1_HUMAN  |  | X |
| Beta-actin-like protein 2                             | ACTBL_HUMAN |  | X |
| Transforming acidic coiled-coil-containing protein 2  | TACC2_HUMAN |  | X |
| Annexin A4                                            | ANXA4_HUMAN |  | X |
| Putative methyltransferase NSUN6                      | NSUN6_HUMAN |  | X |
| Paraneoplastic antigen-like protein 8C                | PNM8C_HUMAN |  | X |
| Cysteine-rich secretory protein 3                     | CRIS3_HUMAN |  | X |
| Neurofilament heavy polypeptide                       | NFH_HUMAN   |  | X |
| Sorbin and SH3 domain-containing protein 1            | SRBS1_HUMAN |  | X |
| Dermcidin                                             | DCD_HUMAN   |  | X |
| Keratin, type I cytoskeletal 15                       | K1C15_HUMAN |  | X |
| CD166 antigen                                         | CD166_HUMAN |  | X |
| Adiponectin                                           | ADIPO_HUMAN |  | X |
| Myeloperoxidase                                       | PERM_HUMAN  |  | X |
| Pleckstrin homology-like domain family A member       | PHLA1_HUMAN |  | X |

|                                                                 |             |  |   |
|-----------------------------------------------------------------|-------------|--|---|
| 1                                                               |             |  |   |
| ATP-binding cassette sub-family B member 5                      | ABCB5_HUMAN |  | X |
| L-lactate dehydrogenase A-like 6A                               | LDH6A_HUMAN |  | X |
| Kinesin-1 heavy chain                                           | KINH_HUMAN  |  | X |
| 6-phosphogluconolactonase                                       | 6PGL_HUMAN  |  | X |
| NEDD4-binding protein 1                                         | N4BP1_HUMAN |  | X |
| cTAGE family member 9                                           | CTGE9_HUMAN |  | X |
| Keratin, type II cytoskeletal 6C                                | K2C6C_HUMAN |  | X |
| Immunoglobulin heavy variable 7-4-1                             | HV741_HUMAN |  | X |
| Immunoglobulin heavy variable 1-69D                             | HV69D_HUMAN |  | X |
| LRP2-binding protein                                            | LR2BP_HUMAN |  | X |
| Immunoglobulin heavy variable 4-30-2                            | HV432_HUMAN |  | X |
| Bromodomain and PHD finger-containing protein 3                 | BRPF3_HUMAN |  | X |
| Flavin reductase (NADPH)                                        | BLVRB_HUMAN |  | X |
| Hemoglobin subunit delta                                        | HBD_HUMAN   |  | X |
| 1-phosphatidylinositol 4,5-bisphosphate phosphodiesterase eta-1 | PLCH1_HUMAN |  | X |
| Adenylate kinase isoenzyme 6                                    | KAD6_HUMAN  |  | X |
| Immunoglobulin heavy variable 3-53                              | HV353_HUMAN |  | X |
| Adenylate kinase isoenzyme 1                                    | KAD1_HUMAN  |  | X |
| Hemoglobin subunit gamma-1                                      | HBG1_HUMAN  |  | X |
| Receptor-type tyrosine-protein phosphatase gamma                | PTPRG_HUMAN |  | X |
| Methanethiol oxidase                                            | SBP1_HUMAN  |  | X |
| Ribosomal protein S6 kinase alpha-3                             | KS6A3_HUMAN |  | X |
| Myosin-15                                                       | MYH15_HUMAN |  | X |
| Glutathione S-transferase omega-1                               | GSTO1_HUMAN |  | X |
| Copine-7                                                        | CPNE7_HUMAN |  | X |

|                                                 |             |  |   |
|-------------------------------------------------|-------------|--|---|
| Importin subunit beta-1                         | IMB1_HUMAN  |  | X |
| Glyceraldehyde-3-phosphate dehydrogenase        | G3P_HUMAN   |  | X |
| Rab GDP dissociation inhibitor beta             | GDIB_HUMAN  |  | X |
| Modulator of apoptosis 1                        | MOAP1_HUMAN |  | X |
| A-kinase anchor protein 9                       | AKAP9_HUMAN |  | X |
| Fibrous sheath-interacting protein 2            | FSIP2_HUMAN |  | X |
| Immunoglobulin heavy variable 3-73              | HV373_HUMAN |  | X |
| FYVE, RhoGEF and PH domain-containing protein 6 | FGD6_HUMAN  |  | X |
| Keratin, type I cuticular Ha1                   | K1H1_HUMAN  |  | X |
| Lysine-specific demethylase 3B                  | KDM3B_HUMAN |  | X |
| Desmin                                          | DESM_HUMAN  |  | X |
| Coiled-coil domain-containing protein 28A       | CC28A_HUMAN |  | X |
| Ephrin type-B receptor 3                        | EPHB3_HUMAN |  | X |
| Carboxypeptidase D                              | CBPD_HUMAN  |  | X |
| Elongator complex protein 3                     | ELP3_HUMAN  |  | X |
| Carbonic anhydrase 3                            | CAH3_HUMAN  |  | X |
| Free fatty acid receptor 4                      | FFAR4_HUMAN |  | X |
| Coagulation factor VII                          | FA7_HUMAN   |  | X |
| Protein ENL                                     | ENL_HUMAN   |  | X |
| Peroxiredoxin-2                                 | PRDX2_HUMAN |  | X |
| Immunoglobulin kappa variable 1-8               | KV108_HUMAN |  | X |
| Immunoglobulin lambda variable 3-9              | LV39_HUMAN  |  | X |
| Tensin-3                                        | TENS3_HUMAN |  | X |
| Aminopeptidase N                                | AMPN_HUMAN  |  | X |
| Intraflagellar transport protein 140 homolog    | IF140_HUMAN |  | X |
| Nucleoprotein TPR                               | TPR_HUMAN   |  | X |

|                                                       |             |  |   |
|-------------------------------------------------------|-------------|--|---|
| Syntaxin-binding protein 5-like                       | STB5L_HUMAN |  | X |
| Pulmonary surfactant-associated protein B             | PSPB_HUMAN  |  | X |
| SHC-transforming protein 3                            | SHC3_HUMAN  |  | X |
| Tetratricopeptide repeat protein 7A                   | TTC7A_HUMAN |  | X |
| Matrix metalloproteinase-15                           | MMP15_HUMAN |  | X |
| TBC1 domain family member 1                           | TBCD1_HUMAN |  | X |
| Endothelial PAS domain-containing protein 1           | EPAS1_HUMAN |  | X |
| GTP-binding protein 8                                 | GTPB8_HUMAN |  | X |
| Immunoglobulin heavy variable 3-20                    | HV320_HUMAN |  | X |
| Cytoplasmic polyadenylation element-binding protein 4 | CPEB4_HUMAN |  | X |
| Coiled-coil domain-containing protein 168             | CC168_HUMAN |  | X |
| Dynein heavy chain 3, axonemal                        | DYH3_HUMAN  |  | X |
| PR domain zinc finger protein 5                       | PRDM5_HUMAN |  | X |
| Protein S100-A9                                       | S10A9_HUMAN |  | X |
| HHIP-like protein 2                                   | HIPL2_HUMAN |  | X |
| Protein S100-A8                                       | S10A8_HUMAN |  | X |
| Plastin-2                                             | PLSL_HUMAN  |  | X |
| Paraneoplastic antigen-like protein 6A                | PNM6A_HUMAN |  | X |
| Cilia- and flagella-associated protein 100            | CP100_HUMAN |  | X |
| DNA topoisomerase 1                                   | TOP1_HUMAN  |  | X |
| Putative trypsin-6                                    | TRY6_HUMAN  |  | X |
| Otogelin                                              | OTOG_HUMAN  |  | X |
| Arf-GAP with dual PH domain-containing protein 2      | ADAP2_HUMAN |  | X |
| Sodium/hydrogen exchanger 1                           | SL9A1_HUMAN |  | X |
| Zinc finger protein 426                               | ZN426_HUMAN |  | X |
| MAP/microtubule affinity-regulating kinase 4          | MARK4_HUMAN |  | X |



|                                                        |             |  |   |
|--------------------------------------------------------|-------------|--|---|
| Uncharacterized protein C6orf10                        | TSBP1_HUMAN |  | X |
| Histone-lysine N-methyltransferase SETD1A              | SET1A_HUMAN |  | X |
| Macrophage metalloelastase                             | MMP12_HUMAN |  | X |
| WAP four-disulfide core domain protein 3               | WFDC3_HUMAN |  | X |
| Spermatogenesis-associated protein 9                   | SPAT9_HUMAN |  | X |
| Protein ZGRF1                                          | ZGRF1_HUMAN |  | X |
| Protein FAM110A                                        | F110A_HUMAN |  | X |
| Inactive phospholipase D5                              | PLD5_HUMAN  |  | X |
| Conserved oligomeric Golgi complex subunit 4           | COG4_HUMAN  |  | X |
| Receptor-type tyrosine-protein phosphatase delta       | PTPRD_HUMAN |  | X |
| Zinc finger protein 404                                | ZN404_HUMAN |  | X |
| Structural maintenance of chromosomes protein 6        | SMC6_HUMAN  |  | X |
| E3 ubiquitin-protein ligase TRIM7                      | TRIM7_HUMAN |  | X |
| Immunoglobulin heavy variable 4-39                     | HV439_HUMAN |  | X |
| Transcription factor SPT20 homolog                     | SP20H_HUMAN |  | X |
| Inactive histone-lysine N-methyltransferase 2E         | KMT2E_HUMAN |  | X |
| Phosphopantothenate--cysteine ligase                   | PPCS_HUMAN  |  | X |
| Unconventional myosin-XV                               | MYO15_HUMAN |  | X |
| Glutaredoxin domain-containing cysteine-rich protein 2 | GRCR2_HUMAN |  | X |
| Sorting nexin-25                                       | SNX25_HUMAN |  | X |
| Zinc finger protein 622                                | ZN622_HUMAN |  | X |
| Ankyrin repeat and SOCS box protein 7                  | ASB7_HUMAN  |  | X |
| Kinesin heavy chain isoform 5A                         | KIF5A_HUMAN |  | X |
| Immunoglobulin heavy variable 3-21                     | HV321_HUMAN |  | X |
| Fibrinogen beta chain                                  | FIBB_HUMAN  |  | X |
| Probable guanine nucleotide exchange factor            | MF2L2_HUMAN |  | X |

|                                           |             |  |   |
|-------------------------------------------|-------------|--|---|
| MCF2L2                                    |             |  |   |
| Coiled-coil domain-containing protein 106 | CC106_HUMAN |  | X |
| Neurexin-3                                | NRX3A_HUMAN |  | X |
| Interferon regulatory factor 7            | IRF7_HUMAN  |  | X |

**Table S3.** Proteins identified in the protein corona formed after the interaction of AuNPs (10.02 ± 0.91 nm) (30 min, incubation) with serum samples belonging to breast cancer patients with different subtypes: luminal A (n = 11), luminal B HER2 negative (n = 10), luminal B HER2 positive (n = 7), HER2 positive (n = 6), and triple negative (n=8). The accession number, gene name and species (Human) were reported.

| Protein Name                                         | UniProt Name | Entry Name | Gene      | Luminal A | Luminal B HER2 negative | Luminal B HER2 positive | HER2 positive | Triple negative |
|------------------------------------------------------|--------------|------------|-----------|-----------|-------------------------|-------------------------|---------------|-----------------|
| Properdin                                            | PROP_HUMAN   | P27918     | CFP       | X         | X                       | X                       | X             | X               |
| Immunoglobulin heavy variable 1-2                    | HV102_HUMAN  | P23083     | IGHV1-2   | X         | X                       | X                       | X             | X               |
| Phosphatidylcholine-sterol acyltransferase           | LCAT_HUMAN   | P04180     | LCAT      | X         | X                       | X                       | X             | X               |
| Cadherin-5                                           | CADH5_HUMAN  | P33151     | CDH5      | X         | X                       | X                       | X             | X               |
| Actin, cytoplasmic 2                                 | ACTG_HUMAN   | P63261     | ACTG1     | X         | X                       | X                       | X             | X               |
| Transforming acidic coiled-coil-containing protein 3 | TACC3_HUMAN  | Q9Y6A5     | TACC3     | X         | X                       | X                       | X             |                 |
| Immunoglobulin heavy variable 1-18                   | HV118_HUMAN  | A0A0C4DH31 | IGHV1-18  | X         | X                       | X                       | X             |                 |
| Immunoglobulin lambda-like polypeptide 1             | IPLL1_HUMAN  | P15814     | IPLL1     | X         | X                       | X                       | X             |                 |
| Serum amyloid A-1 protein                            | SAA1_HUMAN   | P0DJI8     | SAA1      | X         | X                       | X                       |               | X               |
| Lysine-specific demethylase 4C                       | KDM4C_HUMAN  | Q9H3R0     | KDM4C     | X         | X                       | X                       |               | X               |
| Immunoglobulin lambda variable 6-57                  | LV657_HUMAN  | P01721     | IGLV6-57  | X         | X                       | X                       |               | X               |
| Slit homolog 1 protein                               | SLIT1_HUMAN  | O75093     | SLIT1     | X         | X                       | X                       |               | X               |
| Immunoglobulin kappa variable 1-16                   | KV116_HUMAN  | P04430     | IGKV1-16  | X         | X                       | X                       |               | X               |
| Immunoglobulin kappa variable 6D-21                  | KVD21_HUMAN  | A0A0A0MT36 | IGKV6D-21 | X         | X                       | X                       |               | X               |
| Matrix metalloproteinase-9                           | MMP9_HUMAN   | P14780     | MMP9      | X         | X                       | X                       | X             | X               |

|                                                                      |             |            |            |   |   |   |   |   |
|----------------------------------------------------------------------|-------------|------------|------------|---|---|---|---|---|
| Coagulation factor XIII A chain                                      | F13A_HUMAN  | P00488     | F13A1      | X |   | X | X | X |
| Immunoglobulin heavy variable 3-13                                   | HV313_HUMAN | P01766     | IGHV3-13   | X | X | X |   |   |
| Basement membrane-specific heparan sulfate proteoglycan core protein | PGBM_HUMAN  | P98160     | HSPG2      | X | X | X |   |   |
| Filamin-C                                                            | FLNC_HUMAN  | Q14315     | FLNC       | X | X |   |   | X |
| Immunoglobulin kappa variable 1D-16                                  | KVD16_HUMAN | P01601     | IGKV1D-16  | X | X |   |   | X |
| Protein SOGA3                                                        | SOGA3_HUMAN | Q5TF21     | SOGA3      | X | X |   |   | X |
| Pantetheinase                                                        | VNN1_HUMAN  | O95497     | VNN1       | X | X |   |   | X |
| Polymeric immunoglobulin receptor                                    | PIGR_HUMAN  | P01833     | PIGR       | X |   | X |   | X |
| Platelet factor 4 variant                                            | PF4V_HUMAN  | P10720     | PF4V1      | X |   | X |   | X |
| Hepatocyte growth factor activator                                   | HGFA_HUMAN  | Q04756     | HGFAC      | X |   |   | X | X |
| Villin-like protein                                                  | VILL_HUMAN  | O15195     | VILL       |   | X | X | X |   |
| Mitochondrial import inner membrane translocase subunit Tim10 B      | T10B_HUMAN  | Q9Y5J6     | TIMM10 B   |   | X | X | X |   |
| Carbonic anhydrase 2                                                 | CAH2_HUMAN  | P00918     | CA2        |   | X | X |   | X |
| Immunoglobulin kappa variable 6-21                                   | KV621_HUMAN | A0A0C4DH24 | IGKV6-21   |   | X |   | X | X |
| Beta-2-microglobulin                                                 | B2MG_HUMAN  | P61769     | B2M        | X | X |   |   |   |
| Engulfment and cell motility protein 3                               | ELMO3_HUMAN | Q96BJ8     | ELMO3      | X | X |   |   |   |
| Immunoglobulin lambda variable 2-14                                  | LV214_HUMAN | P01704     | IGLV2-14   | X | X |   |   |   |
| Immunoglobulin heavy variable 4-30-4                                 | HVD34_HUMAN | P0DP06     | IGHV4-30-4 | X | X |   |   |   |
| E3 ubiquitin-protein ligase SHPRH                                    | SHPRH_HUMAN | Q149N8     | SHPRH      | X | X |   |   |   |
| Vascular cell adhesion protein 1                                     | VCAM1_HUMAN | P19320     | VCAM1      | X | X |   |   |   |

|                                                                     |             |                |              |   |   |   |   |   |
|---------------------------------------------------------------------|-------------|----------------|--------------|---|---|---|---|---|
| Collectin-11                                                        | COL11_HUMAN | Q9BWP8         | COLEC1<br>1  | X | X |   |   |   |
| Immunoglobulin heavy variable 4-31                                  | HV431_HUMAN | P0DP07         | IGHV4-<br>31 | X | X |   |   |   |
| Tubulin polyglutamylase TTL13P                                      | TTL13_HUMAN | A6NNM8         | TTL13P       | X |   | X |   |   |
| Trypsin-2                                                           | TRY2_HUMAN  | P07478         | PRSS2        | X |   | X |   |   |
| Zinc finger protein 618                                             | ZN618_HUMAN | Q5T7W0         | ZNF618       | X |   | X |   |   |
| N-acetylgalactosaminyltransferase 7                                 | GALT7_HUMAN | Q86SF2         | GALNT7       | X |   | X |   |   |
| Cell division cycle 5-like protein                                  | CDC5L_HUMAN | Q99459         | CDC5L        | X |   |   | X |   |
| Paired mesoderm homeobox protein<br>2B                              | PHX2B_HUMAN | Q99453         | PHOX2B       | X |   |   | X |   |
| Zinc finger protein 33A                                             | ZN33A_HUMAN | Q06730         | ZNF33A       | X |   |   |   | X |
| Lactotransferrin                                                    | TRFL_HUMAN  | P02788         | LTF          | X |   |   |   | X |
| Serine/threonine-protein kinase ATR                                 | ATR_HUMAN   | Q13535         | ATR          | X |   |   |   | X |
| A disintegrin and metalloproteinase<br>with thrombospondin motifs 9 | ATS9_HUMAN  | Q9P2N4         | ADAMT<br>S9  | X |   |   |   | X |
| Immunoglobulin lambda variable 5-<br>45                             | LV545_HUMAN | A0A087<br>WSX0 | IGLV5-<br>45 |   | X | X |   |   |
| Immunoglobulin lambda variable 2-<br>18                             | LV218_HUMAN | A0A075B<br>6J9 | IGLV2-<br>18 |   | X | X |   |   |
| Keratin, type II cuticular Hb5                                      | KRT85_HUMAN | P78386         | KRT85        |   | X | X |   |   |
| Immunoglobulin heavy variable 3-33                                  | HV333_HUMAN | P01772         | IGHV3-<br>33 |   | X | X |   |   |
| Glycerol kinase 2                                                   | GLPK2_HUMAN | Q14410         | GK2          |   | X |   | X |   |
| Calcium-independent phospholipase<br>A2-gamma                       | PLPL8_HUMAN | Q9NP80         | PNPLA8       |   | X |   |   | X |
| Beta-ureidopropionase                                               | BUP1_HUMAN  | Q9UBR1         | UPB1         |   | X |   |   | X |
| ARF GTPase-activating protein<br>GIT1                               | GIT1_HUMAN  | Q9Y2X7         | GIT1         |   | X |   |   | X |
| Transcription factor SOX-30                                         | SOX30_HUMAN | O94993         | SOX30        |   | X |   |   | X |

|                                                       |             |            |          |   |  |   |   |   |
|-------------------------------------------------------|-------------|------------|----------|---|--|---|---|---|
| Forkhead box protein O1                               | FOXO1_HUMAN | Q12778     | FOXO1    |   |  | X | X |   |
| Complement factor H-related protein 3                 | FHR3_HUMAN  | Q02985     | CFHR3    |   |  | X | X |   |
| RasGAP-activating-like protein 1                      | RASL1_HUMAN | O95294     | RASAL1   |   |  | X |   | X |
| DENN domain-containing protein 5B                     | DEN5B_HUMAN | Q6ZUT9     | DENND5B  |   |  | X |   | X |
| Signal-regulatory protein beta-1                      | SIRB1_HUMAN | O00241     | SIRPB1   |   |  | X |   | X |
| Immunoglobulin lambda variable 7-46                   | LV746_HUMAN | A0A075B6I9 | IGLV7-46 |   |  | X |   | X |
| Trypsin-3                                             | TRY3_HUMAN  | P35030     | PRSS3    |   |  |   | X | X |
| Transforming growth factor-beta-induced protein ig-h3 | BGH3_HUMAN  | Q15582     | TGFBI    |   |  |   | X | X |
| Lysozyme C                                            | LYSC_HUMAN  | P61626     | LYZ      | X |  |   |   |   |
| C-reactive protein                                    | CRP_HUMAN   | P02741     | CRP      | X |  |   |   |   |
| Filamin A-interacting protein 1-like                  | FIL1L_HUMAN | Q4L180     | FILIP1L  | X |  |   |   |   |
| ADP-ribosyl cyclase/cyclic ADP-ribose hydrolase 2     | BST1_HUMAN  | Q10588     | BST1     | X |  |   |   |   |
| Transcription factor AP-2-epsilon                     | AP2E_HUMAN  | Q6VUC0     | TFAP2E   | X |  |   |   |   |
| Exocyst complex component 7                           | EXOC7_HUMAN | Q9UPT5     | EXOC7    | X |  |   |   |   |
| Eukaryotic translation initiation factor 3 subunit C  | EIF3C_HUMAN | Q99613     | EIF3C    | X |  |   |   |   |
| Uncharacterized protein FLJ45252                      | YJ005_HUMAN | Q6ZSR9     | N/A      | X |  |   |   |   |
| Titin                                                 | TITIN_HUMAN | Q8WZ42     | TTN      | X |  |   |   |   |
| Wee1-like protein kinase                              | WEE1_HUMAN  | P30291     | WEE1     | X |  |   |   |   |
| Beta-actin-like protein 2                             | ACTBL_HUMAN | Q562R1     | ACTBL2   | X |  |   |   |   |
| Transforming acidic coiled-coil-containing protein 2  | TACC2_HUMAN | O95359     | TACC2    | X |  |   |   |   |
| Annexin A4                                            | ANXA4_HUMAN | P09525     | ANXA4    | X |  |   |   |   |
| Putative methyltransferase NSUN6                      | NSUN6_HUMAN | Q8TEA1     | NSUN6    | X |  |   |   |   |

|                                                   |             |            |            |   |   |  |  |  |
|---------------------------------------------------|-------------|------------|------------|---|---|--|--|--|
| Paraneoplastic antigen-like protein 8C            | PNM8C_HUMAN | A0A1B0GUJ8 | PNMA8C     | X |   |  |  |  |
| Cysteine-rich secretory protein 3                 | CRIS3_HUMAN | P54108     | CRISP3     | X |   |  |  |  |
| Neurofilament heavy polypeptide                   | NFH_HUMAN   | P12036     | NEFH       | X |   |  |  |  |
| Sorbin and SH3 domain-containing protein 1        | SRBS1_HUMAN | Q9BX66     | SORBS1     | X |   |  |  |  |
| Dermcidin                                         | DCD_HUMAN   | P81605     | DCD        | X |   |  |  |  |
| Keratin, type I cytoskeletal 15                   | K1C15_HUMAN | P19012     | KRT15      | X |   |  |  |  |
| CD166 antigen                                     | CD166_HUMAN | Q13740     | ALCAM      | X |   |  |  |  |
| Adiponectin                                       | ADIPO_HUMAN | Q15848     | ADIPOQ     | X |   |  |  |  |
| Myeloperoxidase                                   | PERM_HUMAN  | P05164     | MPO        | X |   |  |  |  |
| Pleckstrin homology-like domain family A member 1 | PHLA1_HUMAN | Q8WV24     | PHLDA1     | X |   |  |  |  |
| ATP-binding cassette sub-family B member 5        | ABCB5_HUMAN | Q2M3G0     | ABCB5      | X |   |  |  |  |
| L-lactate dehydrogenase A-like 6A                 | LDH6A_HUMAN | Q6ZMR3     | LDHAL6A    | X |   |  |  |  |
| Kinesin-1 heavy chain                             | KINH_HUMAN  | P33176     | KIF5B      | X |   |  |  |  |
| 6-phosphogluconolactonase                         | 6PGL_HUMAN  | O95336     | PGLS       | X |   |  |  |  |
| NEDD4-binding protein 1                           | N4BP1_HUMAN | O75113     | N4BP1      | X |   |  |  |  |
| cTAGE family member 9                             | CTGE9_HUMAN | A4FU28     | CTAGE9     |   | X |  |  |  |
| Keratin, type II cytoskeletal 6C                  | K2C6C_HUMAN | P48668     | KRT6C      |   | X |  |  |  |
| Immunoglobulin heavy variable 7-4-1               | HV741_HUMAN | A0A0J9YVY3 | IGHV7-4-1  |   | X |  |  |  |
| Immunoglobulin heavy variable 1-69D               | HV69D_HUMAN | A0A0B4J2H0 | IGHV1-69D  |   | X |  |  |  |
| LRP2-binding protein                              | LR2BP_HUMAN | Q9P2M1     | LRP2BP     |   | X |  |  |  |
| Immunoglobulin heavy variable 4-30-2              | HV432_HUMAN | A0A087WSY4 | IGHV4-30-2 |   | X |  |  |  |
| Bromodomain and PHD finger-                       | BRPF3_HUMAN | Q9ULD4     | BRPF3      |   | X |  |  |  |

|                                                                 |             |            |           |  |   |  |  |  |
|-----------------------------------------------------------------|-------------|------------|-----------|--|---|--|--|--|
| containing protein 3                                            |             |            |           |  |   |  |  |  |
| Flavin reductase (NADPH)                                        | BLVRB_HUMAN | P30043     | BLVRB     |  | X |  |  |  |
| Hemoglobin subunit delta                                        | HBD_HUMAN   | P02042     | HBD       |  | X |  |  |  |
| 1-phosphatidylinositol 4,5-bisphosphate phosphodiesterase eta-1 | PLCH1_HUMAN | Q4KWH8     | PLCH1     |  | X |  |  |  |
| Adenylate kinase isoenzyme 6                                    | KAD6_HUMAN  | Q9Y3D8     | AK6       |  | X |  |  |  |
| Immunoglobulin heavy variable 3-53                              | HV353_HUMAN | P01767     | IGHV3-53  |  | X |  |  |  |
| Adenylate kinase isoenzyme 1                                    | KAD1_HUMAN  | P00568     | AK1       |  | X |  |  |  |
| Hemoglobin subunit gamma-1                                      | HBG1_HUMAN  | P69891     | HBG1      |  | X |  |  |  |
| Receptor-type tyrosine-protein phosphatase gamma                | PTPRG_HUMAN | P23470     | PTPRG     |  | X |  |  |  |
| Methanethiol oxidase                                            | SBP1_HUMAN  | Q13228     | SELENB P1 |  | X |  |  |  |
| Ribosomal protein S6 kinase alpha-3                             | KS6A3_HUMAN | P51812     | RPS6KA 3  |  | X |  |  |  |
| Myosin-15                                                       | MYH15_HUMAN | Q9Y2K3     | MYH15     |  | X |  |  |  |
| Glutathione S-transferase omega-1                               | GSTO1_HUMAN | P78417     | GSTO1     |  | X |  |  |  |
| Copine-7                                                        | CPNE7_HUMAN | Q9UBL6     | CPNE7     |  | X |  |  |  |
| Importin subunit beta-1                                         | IMB1_HUMAN  | Q14974     | KPNB1     |  | X |  |  |  |
| Glyceraldehyde-3-phosphate dehydrogenase                        | G3P_HUMAN   | P04406     | GAPDH     |  | X |  |  |  |
| Rab GDP dissociation inhibitor beta                             | GDIB_HUMAN  | P50395     | GDI2      |  | X |  |  |  |
| Modulator of apoptosis 1                                        | MOAP1_HUMAN | Q96BY2     | MOAP1     |  | X |  |  |  |
| A-kinase anchor protein 9                                       | AKAP9_HUMAN | Q99996     | AKAP9     |  | X |  |  |  |
| Fibrous sheath-interacting protein 2                            | FSIP2_HUMAN | Q5CZC0     | FSIP2     |  | X |  |  |  |
| Immunoglobulin heavy variable 3-73                              | HV373_HUMAN | A0A0B4J1V6 | IGHV3-73  |  | X |  |  |  |
| FYVE, RhoGEF and PH domain-containing protein 6                 | FGD6_HUMAN  | Q6ZV73     | FGD6      |  | X |  |  |  |



|                                              |             |                |             |  |   |   |  |  |
|----------------------------------------------|-------------|----------------|-------------|--|---|---|--|--|
| Keratin, type I cuticular Ha1                | K1H1_HUMAN  | Q15323         | KRT31       |  | X |   |  |  |
| Lysine-specific demethylase 3B               | KDM3B_HUMAN | Q7LBC6         | KDM3B       |  | X |   |  |  |
| Desmin                                       | DESM_HUMAN  | P17661         | DES         |  | X |   |  |  |
| Coiled-coil domain-containing protein 28A    | CC28A_HUMAN | Q8IWP9         | CCDC28<br>A |  | X |   |  |  |
| Ephrin type-B receptor 3                     | EPHB3_HUMAN | P54753         | EPHB3       |  | X |   |  |  |
| Carboxypeptidase D                           | CBPD_HUMAN  | O75976         | CPD         |  | X |   |  |  |
| Elongator complex protein 3                  | ELP3_HUMAN  | Q9H9T3         | ELP3        |  | X |   |  |  |
| Carbonic anhydrase 3                         | CAH3_HUMAN  | P07451         | CA3         |  | X |   |  |  |
| Free fatty acid receptor 4                   | FFAR4_HUMAN | Q5NUL3         | FFAR4       |  | X |   |  |  |
| Coagulation factor VII                       | FA7_HUMAN   | P08709         | F7          |  | X |   |  |  |
| Protein ENL                                  | ENL_HUMAN   | Q03111         | MLLT1       |  | X |   |  |  |
| Peroxiredoxin-2                              | PRDX2_HUMAN | P32119         | PRDX2       |  | X |   |  |  |
| Immunoglobulin kappa variable 1-8            | KV108_HUMAN | A0A0C4<br>DH67 | IGKV1-8     |  | X |   |  |  |
| Immunoglobulin lambda variable 3-9           | LV39_HUMAN  | A0A075B<br>6K5 | IGLV3-9     |  |   | X |  |  |
| Tensin-3                                     | TENS3_HUMAN | Q68CZ2         | TNS3        |  |   | X |  |  |
| Aminopeptidase N                             | AMPN_HUMAN  | P15144         | ANPEP       |  |   | X |  |  |
| Intraflagellar transport protein 140 homolog | IF140_HUMAN | Q96RY7         | IFT140      |  |   | X |  |  |
| Nucleoprotein TPR                            | TPR_HUMAN   | P12270         | TPR         |  |   | X |  |  |
| Syntaxin-binding protein 5-like              | STB5L_HUMAN | Q9Y2K9         | STXBP5<br>L |  |   | X |  |  |
| Pulmonary surfactant-associated protein B    | PSPB_HUMAN  | P07988         | SFTPB       |  |   | X |  |  |
| SHC-transforming protein 3                   | SHC3_HUMAN  | Q92529         | SHC3        |  |   | X |  |  |
| Tetratricopeptide repeat protein 7A          | TTC7A_HUMAN | Q9ULT0         | TTC7A       |  |   | X |  |  |
| Matrix metalloproteinase-15                  | MMP15_HUMAN | P51511         | MMP15       |  |   | X |  |  |

|                                                       |             |            |          |  |  |   |   |  |
|-------------------------------------------------------|-------------|------------|----------|--|--|---|---|--|
| TBC1 domain family member 1                           | TBCD1_HUMAN | Q86TI0     | TBC1D1   |  |  | X |   |  |
| Endothelial PAS domain-containing protein 1           | EPAS1_HUMAN | Q99814     | EPAS1    |  |  | X |   |  |
| GTP-binding protein 8                                 | GTPB8_HUMAN | Q8N3Z3     | GTPBP8   |  |  | X |   |  |
| Immunoglobulin heavy variable 3-20                    | HV320_HUMAN | A0A0C4DH32 | IGHV3-20 |  |  | X |   |  |
| Cytoplasmic polyadenylation element-binding protein 4 | CPEB4_HUMAN | Q17RY0     | CPEB4    |  |  | X |   |  |
| Coiled-coil domain-containing protein 168             | CC168_HUMAN | Q8NDH2     | CCDC168  |  |  | X |   |  |
| Dynein heavy chain 3, axonemal                        | DYH3_HUMAN  | Q8TD57     | DNAH3    |  |  | X |   |  |
| PR domain zinc finger protein 5                       | PRDM5_HUMAN | Q9NQX1     | PRDM5    |  |  | X |   |  |
| Protein S100-A9                                       | S10A9_HUMAN | P06702     | S100A9   |  |  | X |   |  |
| HHIP-like protein 2                                   | HIPL2_HUMAN | Q6UWX4     | HHIPL2   |  |  | X |   |  |
| Protein S100-A8                                       | S10A8_HUMAN | P05109     | S100A8   |  |  | X |   |  |
| Plastin-2                                             | PLSL_HUMAN  | P13796     | LCP1     |  |  | X |   |  |
| Paraneoplastic antigen-like protein 6A                | PNM6A_HUMAN | P0CW24     | PNMA6A   |  |  |   | X |  |
| Cilia- and flagella-associated protein 100            | CP100_HUMAN | Q494V2     | CFAP100  |  |  |   | X |  |
| DNA topoisomerase 1                                   | TOP1_HUMAN  | P11387     | TOP1     |  |  |   | X |  |
| Putative trypsin-6                                    | TRY6_HUMAN  | Q8NHM4     | PRSS3P2  |  |  |   | X |  |
| Otogelin                                              | OTOG_HUMAN  | Q6ZRI0     | OTOG     |  |  |   | X |  |
| Arf-GAP with dual PH domain-containing protein 2      | ADAP2_HUMAN | Q9NPF8     | ADAP2    |  |  |   | X |  |
| Sodium/hydrogen exchanger 1                           | SL9A1_HUMAN | P19634     | SLC9A1   |  |  |   | X |  |
| Zinc finger protein 426                               | ZN426_HUMAN | Q9BUY5     | ZNF426   |  |  |   | X |  |
| MAP/microtubule affinity-regulating kinase 4          | MARK4_HUMAN | Q96L34     | MARK4    |  |  |   | X |  |
| Uncharacterized protein C6orf10                       | TSBP1_HUMAN | Q5SRN2     | TSBP1    |  |  |   | X |  |

|                                                        |             |        |          |  |  |  |   |   |
|--------------------------------------------------------|-------------|--------|----------|--|--|--|---|---|
| Histone-lysine N-methyltransferase SETD1A              | SET1A_HUMAN | O15047 | SETD1A   |  |  |  | X |   |
| Macrophage metalloelastase                             | MMP12_HUMAN | P39900 | MMP12    |  |  |  | X |   |
| WAP four-disulfide core domain protein 3               | WFDC3_HUMAN | Q8IUB2 | WFDC3    |  |  |  | X |   |
| Spermatogenesis-associated protein 9                   | SPAT9_HUMAN | Q9BWV2 | SPATA9   |  |  |  | X |   |
| Protein ZGRF1                                          | ZGRF1_HUMAN | Q86YA3 | ZGRF1    |  |  |  | X |   |
| Protein FAM110A                                        | F110A_HUMAN | Q9BQ89 | FAM110A  |  |  |  |   | X |
| Inactive phospholipase D5                              | PLD5_HUMAN  | Q8N7P1 | PLD5     |  |  |  |   | X |
| Conserved oligomeric Golgi complex subunit 4           | COG4_HUMAN  | Q9H9E3 | COG4     |  |  |  |   | X |
| Receptor-type tyrosine-protein phosphatase delta       | PTPRD_HUMAN | P23468 | PTPRD    |  |  |  |   | X |
| Zinc finger protein 404                                | ZN404_HUMAN | Q494X3 | ZNF404   |  |  |  |   | X |
| Structural maintenance of chromosomes protein 6        | SMC6_HUMAN  | Q96SB8 | SMC6     |  |  |  |   | X |
| E3 ubiquitin-protein ligase TRIM7                      | TRIM7_HUMAN | Q9C029 | TRIM7    |  |  |  |   | X |
| Immunoglobulin heavy variable 4-39                     | HV439_HUMAN | P01824 | IGHV4-39 |  |  |  |   | X |
| Transcription factor SPT20 homolog                     | SP20H_HUMAN | Q8NEM7 | SUPT20H  |  |  |  |   | X |
| Inactive histone-lysine N-methyltransferase 2E         | KMT2E_HUMAN | Q8IZD2 | KMT2E    |  |  |  |   | X |
| Phosphopantothenate--cysteine ligase                   | PPCS_HUMAN  | Q9HAB8 | PPCS     |  |  |  |   | X |
| Unconventional myosin-XV                               | MYO15_HUMAN | Q9UKN7 | MYO15A   |  |  |  |   | X |
| Glutaredoxin domain-containing cysteine-rich protein 2 | GRCR2_HUMAN | A6NFK2 | GRXCR2   |  |  |  |   | X |
| Sorting nexin-25                                       | SNX25_HUMAN | Q9H3E2 | SNX25    |  |  |  |   | X |
| Zinc finger protein 622                                | ZN622_HUMAN | Q969S3 | ZNF622   |  |  |  |   | X |
| Ankyrin repeat and SOCS box                            | ASB7_HUMAN  | Q9H672 | ASB7     |  |  |  |   | X |

|                                                    |             |            |          |  |  |  |  |   |
|----------------------------------------------------|-------------|------------|----------|--|--|--|--|---|
| protein 7                                          |             |            |          |  |  |  |  |   |
| Kinesin heavy chain isoform 5A                     | KIF5A_HUMAN | Q12840     | KIF5A    |  |  |  |  | X |
| Immunoglobulin heavy variable 3-21                 | HV321_HUMAN | A0A0B4J1V1 | IGHV3-21 |  |  |  |  | X |
| Fibrinogen beta chain                              | FIBB_HUMAN  | P02675     | FGB      |  |  |  |  | X |
| Probable guanine nucleotide exchange factor MCF2L2 | MF2L2_HUMAN | Q86YR7     | MCF2L2   |  |  |  |  | X |
| Coiled-coil domain-containing protein 106          | CC106_HUMAN | Q9BWC9     | CCDC106  |  |  |  |  | X |
| Neurexin-3                                         | NRX3A_HUMAN | Q9Y4C0     | NRXN3    |  |  |  |  | X |
| Interferon regulatory factor 7                     | IRF7_HUMAN  | Q92985     | IRF7     |  |  |  |  | X |
